# Supplementary material
Source: ML conference proceedings conference paper supplement (https://openreview.net/forum?id=5ALGcXpmFyC)
Supplement: supplementary_material [file attachment]

# TRAINING DATA SIZE INDUCED DOUBLE DESCENT FOR DENOISING NEURAL NETWORKS AND THE ROLE OF TRAINING NOISE LEVEL.

**Anonymous authors**

Paper under double-blind review

## ABSTRACT

When training a denoising neural network, we show that more data isn't more beneficial. In fact the generalization error versus number of training data points is a double descent curve.

Training a network to denoise noisy inputs is the most widely used technique for pre-training deep neural networks. Hence one important question is the effect of scaling the number of training data points. We formalize the question of how many data points should be used by looking at the generalization error for denoising noisy test data. Prior work on computing the generalization error focus on adding noise to target outputs. However, adding noise to the input is more in line with current pre-training practices. In the linear (in the inputs) regime, we provide an asymptotically exact formula for the generalization error for rank 1 data and an approximation for the generalization error for rank  $r$  data. We show using our formulas, that the generalization error versus number of data points follows a double descent curve. From this, we derive a formula for the amount of noise that needs to be added to the training data to minimize the denoising error and see that this follows a double descent curve as well.

## 1 INTRODUCTION

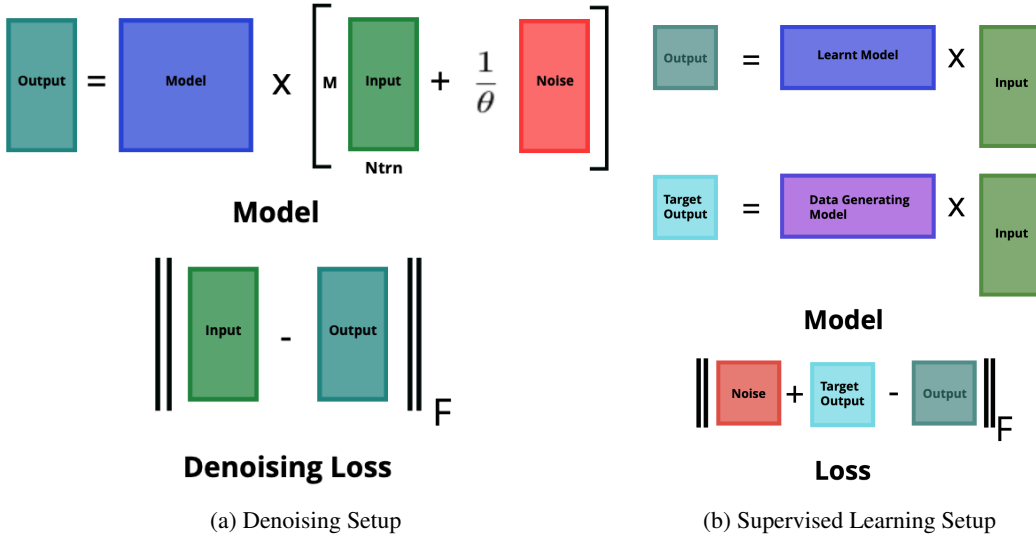

Figure 1: Figure showing the difference in the noise placement between the traditional supervised learning set up for which empirical and theoretical double descent curves have been found versus our denoising set up for which we recover double descent curves.

Denoising noisy training data is a widely used technique for pretraining networks to learn good representations of the data. Two extremely common examples of pretraining via denoising are

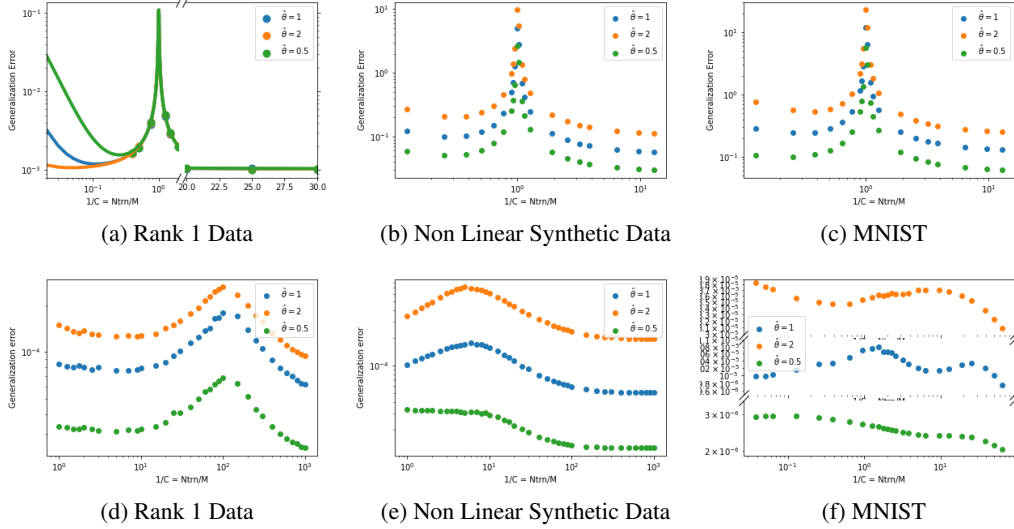

Figure 2: Figure showing the double descent phenomena for the generalization error versus the number of the training data points. The top row is for a linear network and the bottom row is for a 3 layer ReLU network.

Masked Language Modelling (MLM) (Devlin et al., 2019) and Stacked Denoising Autoencoders (SDAE) (Vincent et al., 2010). For many modern problem, we work at large scales in terms of the number of parameters and the number of training samples. Recently there has been significant work in understanding the effect of scaling the number of parameters in the neural network. This resulted in the discovery of the much celebrated double descent phenomena (Belkin et al., 2019). However, we do not have as good of an understanding of the effect of scaling the number of data points. Nakkiran et al. (2020) show empirically for classification the generalization error versus the number of data points follows a double descent curve. This is followed up by Nakkiran (2020) where they show via theoretical analysis that for regression with Gaussian covariates this double descent exists as well. However, these were in the regime of supervised learning (classification or linear regression). On the other hand, our motivation comes from understanding denoising autoencoders. For MLM and SDAEs the denoising is a pretraining procedure, in which case the generalization error would depend on the downstream task. We shall instead look at the generalization error with respect to denoising test data. The difference between prior supervised learning set up and our denoising set up can be seen in Figure 1.

As seen in Figure 2, we show that if we train a feedforward network to denoise data such that the training data signal to noise ratio (SNR)  $\hat{\theta}_{trn}$  is the same SNR as that of the test data set ( $\hat{\theta}_{tst}$ ), then the curve for the denoising generalization error vs the number of training samples has the same shape as a double descent curve. Thus, we see that even in unsupervised learning this double descent curve exists. Thus, together with Nakkiran et al. (2020), this suggests that the double descent with respect to the number of data points is a universal phenomena. However, unlike other hyperparameters, such as number of features and the level of training noise, we cannot arbitrarily change the number of data points as we are limited by the data set that we have. Hence it could be the case, that the maximum number of data points that we have corresponds to the peak of the generalization error curve. The question then is whether, we should train on a smaller subset of our data point?

Fortunately, there are other hyper-parameters that we can tune. Specifically, we can look at the amount of noise that we add to the training data. To see the effect of the noise, for a variety of different  $\hat{\theta}_{trn}/\hat{\theta}_{tst}$ , we compute the denoising generalization error versus the number of data points curve. As we can see in Figures 3a (MNIST) and 3e (CIFAR10), by increasing the amount of training noise, we can mitigate the increase in the generalization error that occurs when we increase the number of data points. Interestingly, as seen in Figures 3c and 3g, we see that the shape of the curve for the values  $\hat{\theta}_{trn}/\hat{\theta}_{tst}$  that results in the best generalization error versus the number data points also has the shape of a double descent curve.

In an attempt to theoretically understand why these phenomena occur, we look at the simplest setting. Specifically we look at the case, when our network is a linear network and we are denoising data that lies on a line embedded in high dimensional space. In this setting, we derive the exact asymptotics for the generalization error. We see that in this case, the generalization error spikes at the interpolation threshold (Figure 4a) and the amount of noise that we want to add also spikes at the interpolation threshold (Figure 4b). From the theoretical analysis, we see that the spike occurs due to the variance of the model increasing. As always, we can reduce the variance of the model by increasing the amount of regularization. It is already well known that adding noise acts like a regularizer (Bishop, 1995). Hence we can increase the amount of regularization by increasing the amount of noise. While this simple model captures most of the features seen in Figure 3, the model does not capture the phenomenon that increasing the amount of training noise gets rid of the double descent in the generalization error.

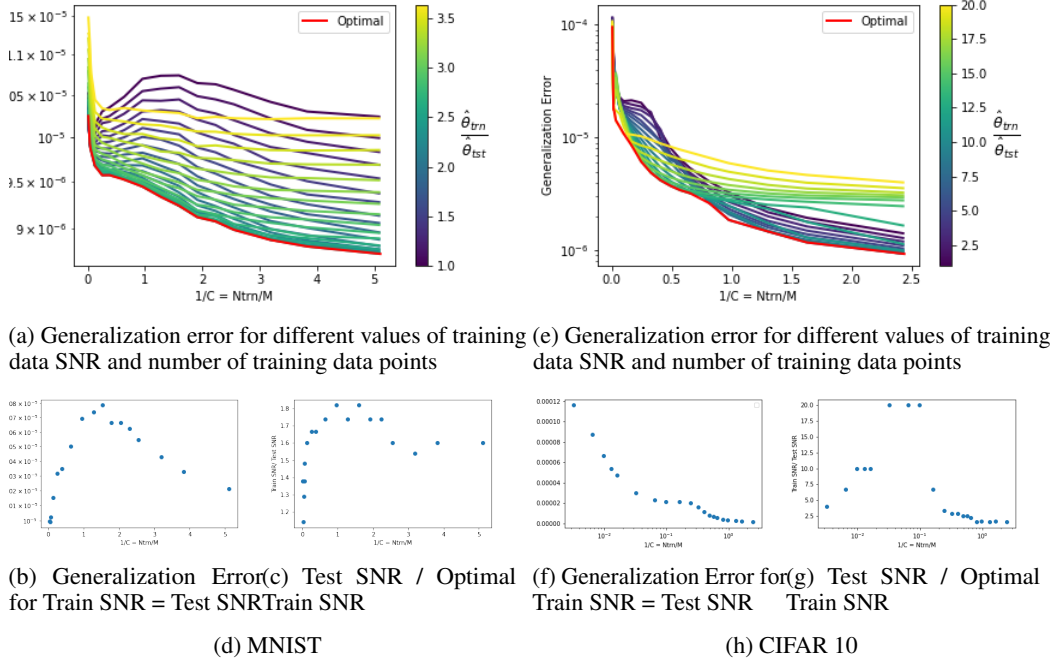

Figure 3: Figure showing the denoising generalization error for a 3 layer neural network trained for various different values of  $\hat{\theta}_{trn}/\hat{\theta}_{tst}$  and number of training data points. The test set for each data is the standard test data for those data sets. Each neural network was trained for 1500 epochs, using gradient descent with a learning rate of  $10^{-3}$ . For MNIST, we averaged over 20 trials and for CIFAR10 we averaged over 5 trials.

**Contributions.** We continue the work of discovering and understanding the double descent phenomena for the generalization error. However, we will do so from the perspective of understanding the effect of the number of training samples. In contrast to the previous work, our work will focus on the representation learning set up inspired by MLM and SDAEs. That is, we will add noise to the input data and look at the denoising error. Further, taking inspiration from SDAEs, in which the pre-training only involves training 2 layer neural networks, we study the case of a 2 layer linear networks without bias.

The main contributions of our paper are as follows.

1. We show that when denoising data using a feedforward network, the curve for the generalization error versus the number of training data points as well as the curve for the ratio of the test data SNR to the optimal training data SNR has double descent. Further changing the training data SNR can mitigate the double descent in the generalization error curve.
2. Assuming we have mean 0, rotational invariant noise, we derive an analytical formula for the expected mean squared generalization error for denoising rank 1 data by a linear

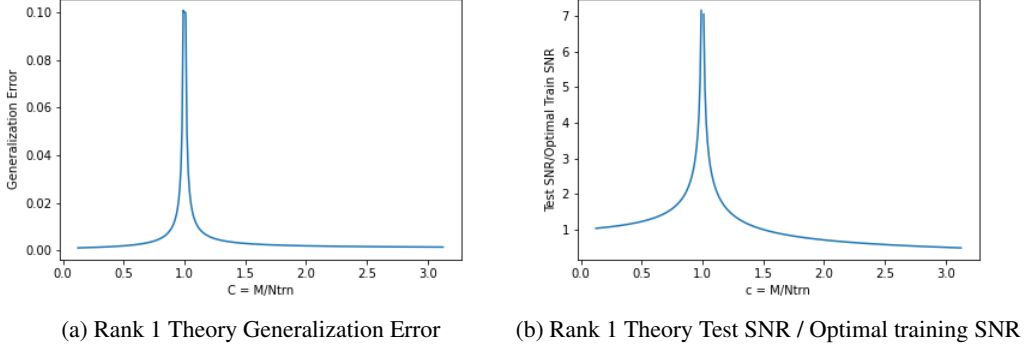

Figure 4: Plot showing the double descent curves for the generalization error as well the optimal training SNR. Here  $M = 1000$  and  $\theta_{tst} = 1$  and  $c$  was changed by changing  $N_{trn}$ .

network. Further, we use the same method to derive an approximation for higher rank data and experimentally verify the accuracy of the formula for general low rank data.

3. Using our formula, we show that even in this simple model, we see that the double descent exists for the generalization error and for the amount of noise that should be added versus the number of training data points.

**Related work.** Understanding deep neural networks is current active area of research with many exciting theoretical results. The discovery that fixed depth infinite width neural networks can be thought of as kernel regression (Jacot et al., 2018) and the discovery of double descent for neural networks (Belkin et al., 2019) has sparked significant research into understanding the generalization in the linear regime (in parameters not inputs). The exact asymptotic for generalization loss were first understood for ridge regression (Bartlett et al., 2020; Hastie et al., 2019; Belkin et al., 2020; Advani & Saxe, 2020). This was further generalized to understand the situation for the Random Features model and the Neural Tangent Kernel (NTK) model (Mei & Montanari, 2019; Ghorbani et al., 2019; Adlam & Pennington, 2020). A partial list of recent work includes Derezinski et al. (2020); d’Ascoli et al. (2020); Dobriban & Wager (2015); Geiger et al. (2019); Lampinen & Ganguli (2019); Liang et al. (2020); Muthukumar et al. (2019); Loureiro et al. (2021).

## 2 SET-UP

Let  $U \in \mathbb{R}^{M \times r}$  be our feature matrix. For ease of notation, we assume that the columns of  $U$  have unit norm and are pairwise orthogonal. Then to generate  $N$  data points, we sample our latent variables  $V \in \mathbb{R}^{r \times N}$  and  $\Sigma \in \mathbb{R}_+^{r \times r}$  such that  $V$  has columns that have unit norm and are pairwise orthogonal and  $\Sigma$  is a diagonal matrix such that  $\|\Sigma\|_F = 1$ . Then a data matrix  $X$  is given by  $X = U\Sigma V^T$ . For us, we have two matrices  $X_{trn}$  and  $X_{tst}$  that correspond to the train and test data sets. Hence we have corresponding  $V_{trn} \in \mathbb{R}^{r \times N_{trn}}$ ,  $V_{tst} \in \mathbb{R}^{r \times N_{tst}}$ , and  $\Sigma_{trn}, \Sigma_{tst}$ . We make no other assumptions on  $U, V_{trn}, \Sigma_{trn}, V_{tst}, \Sigma_{tst}$  except that they are given and fixed. Finally, let  $\theta_{tst}, \theta_{trn} \in \mathbb{R}_+$  be scalars that will scale the singular values of  $X_{trn}, X_{tst}$  so that we can control the SNR. We also assume that  $\theta_{tst}$  is fixed and that we have control over  $\theta_{trn}$ . Let  $c = M/N_{trn}$  and let  $A_{trn}, A_{tst}$  be noise matrices that are added to the training and the test data. Let  $W$  be the linear autoencoder that is the solution to the following problem

$$\underset{\hat{W}}{\text{minimize}} \quad \|\theta_{trn} X_{trn} - \underbrace{\hat{W}(\theta_{trn} X_{trn} + A_{trn})}_{Y_{trn}}\|_F^2. \quad (1)$$

Then, the expected mean squared error, is given by

$$R(\theta_{trn}, \theta_{tst}, c, \Sigma_{trn}, \Sigma_{tst}) := \mathbb{E} \left[ \frac{\|\theta_{tst} X_{tst} - W(\theta_{tst} X_{tst} + A_{tst})\|_F^2}{N_{tst}} \right]. \quad (2)$$

## 2.1 ASSUMPTIONS ABOUT THE NOISE

We assume that each entry of the noise matrix  $A$  has mean 0, variance  $1/M$  and that the entries of  $A$  are pairwise uncorrelated. Additionally, we shall assume that  $A$  is rotationally bi-invariant. That is, if  $Q$  is an  $M$  by  $M$  ( $N$  by  $N$ ) orthogonal matrix, then  $QA$  ( $AQ$ ) has the same distribution as  $A$ . Another way to phrase this is if  $A = U_A \Sigma_A V_A^T$  is the SVD, then  $U_A$  and  $V_A$  are uniformly random orthogonal matrices and are independent from  $\Sigma_A$  and each other. Finally, we shall assume that  $A$  has full rank with probability 1 and that the limiting distribution of the eigenvalues of  $AA^T$  converge to the Marchenko-Pastur distribution. While such assumptions on the noise may seem restrictive. This encompasses a large family of noise distributions.

**Proposition 1.** *If  $B$  is a random matrix that has full rank with probability 1 and its entries are independent, have mean 0, and have variance  $1/M$  and  $P, Q$  are uniformly random orthogonal matrices. Then  $A = PBQ$  satisfies all of our noise assumptions.*

## 2.2 SIGNAL TO NOISE RATIO (SNR)

A quantity of interest to us will be the SNR, given by  $\|X\|_F / \|A\|_F$ . Hence, we need to normalize everything by  $\|A\|_F$ . In this case, due to our assumptions, we have that  $\mathbb{E}[\|A\|_F^2] = N$ . Hence, for any variables and constants, if it has a hat, then that refers to that variable or constant normalized by  $\sqrt{N}$ . For example, given  $\theta_{trn}$ ,  $X_{trn}$ , and  $A_{trn}$ , then we have that

$$\|\theta_{trn} X_{trn}\|_F / \|A_{trn}\|_F = \theta_{trn} / \|A_{trn}\|_F \approx \theta_{trn} / \sqrt{N_{trn}} =: \hat{\theta}_{trn}.$$

## 3 THEORETICAL RESULTS AND CONSEQUENCES

The main theoretical result of the paper is summarized below in Theorem 1.

**Theorem 1.** *Let  $\sigma_i^{trn}, \sigma_i^{tst}$  be entries of  $\Sigma_{trn}, \Sigma_{tst}$  and let  $r = 1$ . Let  $c = M/N_{trn}$ . Then, if  $c < 1$ , we have that*

$$R(\theta_{trn}, \theta_{tst}, c, \Sigma_{trn}, \Sigma_{tst}) = \frac{(\theta_{tst} \sigma_1^{tst})^2}{N_{tst}(1 + (\theta_{trn} \sigma_1^{trn})^2 c)^2} + \frac{c^2((\theta_{trn} \sigma_1^{trn})^2 + (\theta_{trn} \sigma_1^{trn})^4)}{M(1 + (\theta_{trn} \sigma_1^{trn})^2 c)^2(1 - c)} + o(1) \quad (3)$$

and if  $c > 1$ , we have that

$$R(\theta_{trn}, \theta_{tst}, c, \Sigma_{trn}, \Sigma_{tst}) = \frac{(\theta_{tst} \sigma_1^{tst})^2}{N_{tst}(1 + (\theta_{trn} \sigma_1^{trn})^2)^2} + \frac{c(\theta_{trn} \sigma_1^{trn})^2}{M(1 + (\theta_{trn} \sigma_1^{trn})^2)(c - 1)} + o(1). \quad (4)$$

The  $o(1)$  error term goes to 0 as  $N_{trn}, M \rightarrow \infty$ .

Let us also present an approximation for the formula for higher rank data. To do so we shall need some notation. Let  $X_{trn} = \sum_{i=1}^r \sigma_i^{trn} u_i (v_i^{trn})^T$ . Let  $A_{trn}$  be the noise matrix. For  $1 \leq j \leq r$ , define

$$A_j = \left( A_{trn} + \sum_{i=1}^{j-1} \sigma_i^{trn} u_i (v_i^{trn})^T \right)$$

If we now assume that  $A_j$  has similar spectral properties to  $A_{trn}$ . Then we would get the following formula for rank  $r$  data<sup>1</sup>

$$R(\theta_{trn}, \theta_{tst}, c, \Sigma_{trn}, \Sigma_{tst}) = \sum_{i=1}^r \frac{(\theta_{tst} \sigma_i^{tst})^2}{N_{tst}(1 + (\theta_{trn} \sigma_i^{trn})^2 c)^2} + \frac{c^2((\theta_{trn} \sigma_i^{trn})^2 + (\theta_{trn} \sigma_i^{trn})^4)}{M(1 + (\theta_{trn} \sigma_i^{trn})^2 c)^2(1 - c)} + o(1) \quad (5)$$

and if  $c > 1$ , we have that

$$R(\theta_{trn}, \theta_{tst}, c, \Sigma_{trn}, \Sigma_{tst}) = \sum_{i=1}^r \frac{(\theta_{tst} \sigma_i^{tst})^2}{N_{tst}(1 + (\theta_{trn} \sigma_i^{trn})^2)^2} + \frac{c(\theta_{trn} \sigma_i^{trn})^2}{M(1 + (\theta_{trn} \sigma_i^{trn})^2)(c - 1)} + o(1). \quad (6)$$

Before we prove Theorem 1, let us look at some of its consequences.

<sup>1</sup>Derivation and exact assumptions are in the appendix.

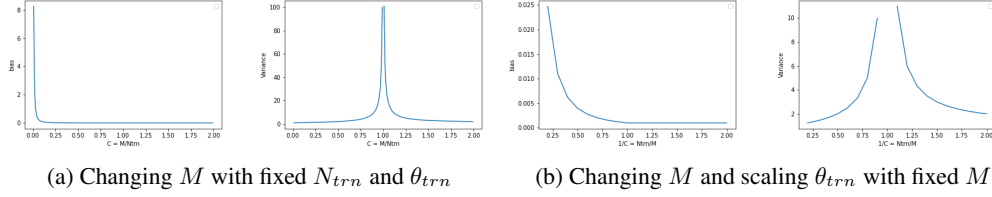Figure 5: Plots for the bias and variance of the model as we change  $M$  and  $N_{trn}$ .

### 3.1 OPTIMAL AMOUNT OF NOISE

First, if we ignore the error term, we can differentiate the formula to get the following formula for the optimal training SNR.

$$\frac{\theta_{opt-trn}^2}{N_{trn}} = \begin{cases} \max\left(0, \frac{\theta_{tst}^2}{N_{tst}} \left(1 - \frac{c}{2-c}\right) - \frac{c}{M(2-c)}\right) & c < 1 \\ \max\left(0, 2 \frac{\theta_{tst}^2}{N_{tst}} (c-1) - \frac{1}{N_{trn}}\right) & c > 1 \end{cases} \quad (7)$$

We already see the surprising result that the optimal training SNR and the test SNR are not equal. This is surprising, as traditional philosophy is that the training data should be drawn from the same distribution as the test data. Here instead we see that the optimal training distribution actually depends on  $c$ . Further, the formulas in Equation 7 also describe a double descent curve for  $\theta_{opt-trn}/N_{trn}$  versus  $c$  curve as shown in Figure 4b.

### 3.2 DOUBLE DESCENT CURVES

We have already seen that the optimal amount of training noise follows a double descent curve. This is due to the double descent seen in the asymptotics for the generalization error. To understand this phenomenon, we first note that the bias of our model is given by the first term in formula in Theorem 1 and the variance is given by the second term. That is, we have that the variance given by

$$\begin{cases} \sum_{i=1}^r \frac{c^2((\theta_{trn}\sigma_i^{trn})^2 + (\theta_{trn}\sigma_i^{trn})^4)}{M(1+(\theta_{trn}\sigma_i^{trn})^2c)^2(1-c)} & c < 1 \\ \sum_{i=1}^r \frac{c(\theta_{trn}\sigma_i^{trn})^2}{M(1+(\theta_{trn}\sigma_i^{trn})^2)(c-1)} & c > 1 \end{cases}$$

From these formulas, we can see that as  $c \rightarrow 1$  these formulas have a singularity. Since we have a linear model  $c = 1$  is the interpolation threshold (i.e., the point after which we have 0 training error). Hence as with previous models for double descent, we see that as we approach the interpolation threshold, the variance of model increases, resulting in an increase in the generalization error.

If we fix the number of features  $M$  and change  $c$  by varying  $N_{trn}$ , and also scale  $\theta_{trn}$  as  $\theta_{trn} = \hat{\theta}_{trn} \sqrt{N_{trn}}$ , then we see that as  $c \rightarrow 1$ , the variance of the model increases. Once we have enough data points so that  $c < 1$ , we have the variance of the model starts decreasing. Additionally, we see that as we increase the number of data points, the bias decreases until we hit the interpolation threshold, after this point, the bias is constant. Similarly, if we fixed  $N_{trn}$  and changed  $c$  by changing  $M$  then after the interpolation threshold, the inductive bias of the model kicks in. Here we see that the variance terms corresponds to  $\|W\|_F^2$ . Hence we see that as we send  $c \rightarrow \infty$ , we have that we implicitly regularize the weights of the network and get the second descent in the generalization error. That is, the variance of the model decreases as  $c \rightarrow \infty$ . Additionally, we see that as we increase the number of parameters, the bias of the model of the model decreases and then after the interpolation threshold it becomes constant. Note that this value is non-zero and depends on the training SNR.

In many previous works, we see that optimal regularization results in the vanishing of the double descent curve. However, in our theoretical model that is not the case, even with optimally picking the amount of training noise, we still have double descent. This is in contrast to results seen in with a deep network on real data in Figure 3 and in previous work such as Nakkiran et al. (2020); Mei & Montanari (2019), where optimal regularization gets rid of the double descent.

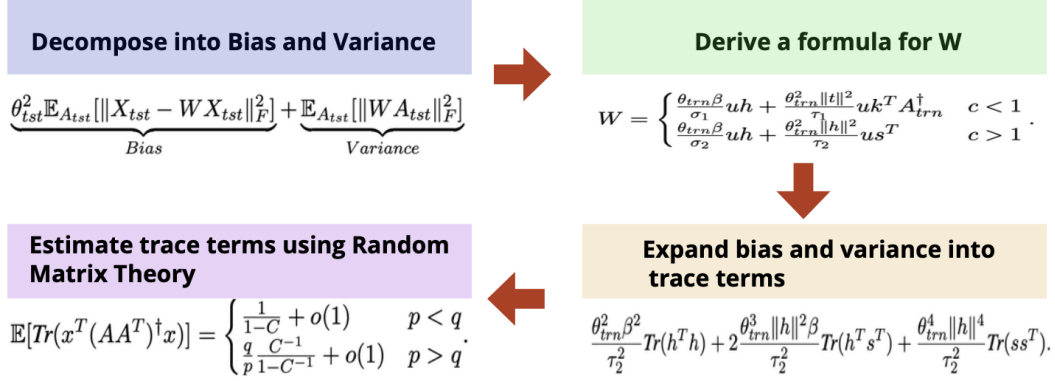

Figure 6: Figure showing the major steps used to derive the formula for the generalization error.

## 4 PROOF OF THEOREM 1

We prove Theorem 1, via the following steps as shown in Figure 6. The proofs for all of the lemmas have been moved to the appendix. Here we present a proof sketch for Theorem 1 that details the high-level ideas.

1. Decompose the error into bias and variance terms
2. Derive an analytical formula for  $W$ .
3. Decompose the terms into sum of various trace terms.
4. Estimate each term using random matrix theory.

### 4.1 STEP 1: DECOMPOSE THE ERROR INTO BIAS AND VARIANCE TERMS

First, we decompose the error into its bias and variance.

**Lemma 1.** *If  $A_{tst}$  has mean 0 entries and  $A_{tst}$  is independent of  $X_{tst}$  and  $W$ , then*

$$\mathbb{E}_{A_{tst}} [\|\theta_{tst} X_{tst} - W Y_{tst}\|_F^2] = \underbrace{\theta_{tst}^2 \mathbb{E}_{A_{tst}} [\|X_{tst} - W X_{tst}\|_F^2]}_{Bias} + \underbrace{\mathbb{E}_{A_{tst}} [\|W A_{tst}\|_F^2]}_{Variance}. \quad (8)$$

### 4.2 STEP 2: FORMULA FOR $W$

In our current setup, we know that  $W$  is the solution to a least-squares problem. Hence  $W = X_{trn} Y_{trn}^\dagger$ . Expanding this out, we get the following formula for  $W$ . Let  $h = v_{trn}^T A_{trn}^\dagger$ ,  $k = A_{trn}^\dagger u$ ,  $s = (I - A_{trn} A_{trn}^\dagger) u$ ,  $t = v_{trn} (I - A_{trn}^\dagger A_{trn})$ ,  $\beta = 1 + \theta_{trn} v_{trn}^T A_{trn}^\dagger u$ ,  $\tau_1 = \theta_{trn}^2 \|t\|^2 \|k\|^2 + \beta^2$ , and  $\tau_2 = \theta_{trn}^2 \|s\|^2 \|h\|^2 + \beta^2$ .

**Proposition 2.** *If  $\beta \neq 0$  and  $A_{trn}$  has full rank then*

$$W = \begin{cases} \frac{\theta_{trn}\beta}{\sigma_1} u h + \frac{\theta_{trn}^2 \|t\|^2}{\tau_1} u k^T A_{trn}^\dagger & c < 1 \\ \frac{\theta_{trn}\beta}{\sigma_2} u h + \frac{\theta_{trn}^2 \|h\|^2}{\tau_2} u s^T & c > 1 \end{cases}$$

When we have Gaussian noise, then with probability 1,  $A_{trn}$  has full rank and for Gaussian distributions  $\beta$  is a random variable whose expected value is equal to 1, and the distribution is highly concentrated. Thus, Proposition 2 applies when  $A_{trn}$  is isotropic Gaussian noise. Here we restricted ourselves to rank 1, as using Meyer (1973), we can expand formulas of the form  $(A + xy^T)^\dagger$  where  $x, y$  are vectors. For the rank 2 case, we apply this formula twice. This is the main difficulty of the new method. Previous work on deriving asymptotics for the generalization error had the noise on the output. Hence we would take the pseudoinverse of a matrix that only depended on the data. However, in our case, we are taking the pseudoinverse of matrix that depends on the noise as well.

### 4.3 STEP 3: DECOMPOSE THE TERMS INTO SUM OF VARIOUS TRACE TERMS.

Let us first look at the bias term.

**Lemma 2.** *If  $W$  is the solution to Equation 1, then*

$$X_{tst} - WX_{tst} = \begin{cases} \frac{\beta}{\tau_1} X_{tst} & \text{if } c < 1 \\ \frac{\beta}{\tau_2} X_{tst} & \text{if } c > 1 \end{cases}.$$

Let us now look at the second or the variance term.

**Lemma 3.** *If the entries of  $A_{tst}$  are independent with mean 0, and variance  $1/M$ , then we have that  $\mathbb{E}_{A_{tst}}[\|WA_{tst}\|^2] = \frac{N_{tst}}{M}\|W\|^2$ .*

Note that this did not need any assumptions on  $W$  or  $X_{tst}$ . All that was needed were the assumptions on  $A_{tst}$ . Thus, this holds more generally. This decomposition also follows from Bishop (1995). In light of Lemmas 1, 2, 3, and the fact that  $\|X_{tst}\|_F^2 = \theta_{tst}^2$ , we see that the expected mean squared generalization error is given by,

$$\mathbb{E}_{A_{tst}} \left[ \frac{\|\theta_{tst}X_{tst} - WY_{tst}\|_F^2}{N_{tst}} \right] = \frac{1}{N_{tst}} \frac{\beta^2}{\tau_i^2} \theta_{tst}^2 + \frac{1}{M} \|W\|_F^2,$$

where  $\tau_i$  depends on whether  $c < 1$  or  $c > 1$ . Finally, let us look at the  $\|W\|$  term.

**Lemma 4.** *If  $\beta \neq 0$  and  $A_{trn}$  has full rank, then we have that if  $c < 1$ ,*

$$\|W\|_F^2 = \frac{\theta_{trn}^2 \beta^2}{\tau_1^2} \text{Tr}(h^T h) + 2 \frac{\theta_{trn}^3 \|t\|^2 \beta}{\tau_1^2} \text{Tr}(h^T k^T A_{trn}^\dagger) + \frac{\theta_{trn}^4 \|t\|^4}{\tau_1^2} \text{Tr}((A_{trn}^\dagger)^T k k^T A_{trn}^\dagger)$$

*and if  $c > 1$ , then we have that*

$$\|W\|_F^2 = \frac{\theta_{trn}^2 \beta^2}{\tau_2^2} \text{Tr}(h^T h) + 2 \frac{\theta_{trn}^3 \|h\|^2 \beta}{\tau_2^2} \text{Tr}(h^T s^T) + \frac{\theta_{trn}^4 \|h\|^4}{\tau_2^2} \text{Tr}(s s^T).$$

#### 4.4 STEP 4: ESTIMATE USING RANDOM MATRIX THEORY.

While the formula given by Lemmas 1, 3, and 4 is correct, we need a simpler formula to analyze the situation. Using ideas from random matrix theory, we can simplify the expression for  $\|W\|_F^2$ . To do so, we first need to prove Lemmas 5 and 6.

The main idea behind Lemmas 5 and 6 is that due to the rotational invariance of  $A_{trn}$ , the expectation of the trace of products of various matrices derived from  $A_{trn}$  is determined by the expected value of some function  $\chi$  of the eigenvalues of  $A_{trn}$ . However, instead of directly computing this expected value, we note that for any matrix  $A$ , that satisfies the noise assumptions, if we let  $M, N \rightarrow \infty$ , with  $M/N \rightarrow c$ , then the eigenvalue distribution converges to the Marchenko - Pastur distribution Marcenko & Pastur (1967); Götze & Tikhomirov (2011; 2003; 2004; 2005); Bai et al. (2003). Götze & Tikhomirov (2004) showed that the distribution of the eigenvalues converged almost surely with a rate of at least  $O(N^{-1/2+\epsilon})$  for any  $\epsilon > 0$ . Thus, we can use the expected value of the  $\chi(\lambda)$  for  $\lambda$  sampled from the Marchenko - Pastur distribution as an approximation.

For space reasons, we provide only one instance of the lemmas in the main text. The complete versions can be found in the appendix.

**Lemma 5.** *Suppose  $A$  is an  $p$  by  $q$  matrix such that the entries of  $A$  are independent and have mean 0, variance  $1/q$ , and bounded fourth moment. Let  $W_p = AA^T$  and let  $W_q = A^T A$ . Let  $C = p/q$ . Suppose  $\lambda_p, \lambda_q$  are a random eigenvalue of  $W_p, W_q$ . Then*

$$1. \text{ If } p < q, \text{ then } \mathbb{E} \left[ \frac{1}{\lambda_p} \right] = \frac{1}{1-C} + o(1).$$

**Lemma 6.** *Suppose  $A$  is an  $p$  by  $q$  matrix that satisfies the noise assumptions. Let  $x, y$  be unit vectors in  $p$  and  $q$  dimensions. Let  $C = p/q$ . Then*

$$1. \mathbb{E}[\text{Tr}(x^T (AA^T)^\dagger x)] = \begin{cases} \frac{1}{1-C} + o(1) & p < q \\ \frac{q}{p} \frac{C^{-1}}{1-C^{-1}} + o(1) & p > q \end{cases}.$$

Using these technical lemmas, we can now deal with all of the terms in the expressions in Lemma 4. First, let us look at the non-trace terms.



**Lemma 7.** If  $A_{trn}$  satisfies the standard noise assumptions, then we have that

1.  $\mathbb{E}[\beta/\theta_{trn}] = 1/\theta_{trn} + o(1)$  and  $\text{Var}(\beta) = \frac{c^2}{(\max(M, N_{trn})|1-c|)} + o(1)$ .
2. If  $c < 1$ , then  $\mathbb{E}[\|h\|^2] = \frac{c^2}{1-c} + o(1)$  and  $\text{Var}(\|h\|^2) = \frac{c^3(2+c)}{N_{trn}(1-c)^3} + o(1)$ .
3. If  $c > 1$ , then  $\mathbb{E}[\|h\|^2] = \frac{c}{c-1} + o(1)$  and  $\text{Var}(\|h\|^2) = \frac{c^2(2c-1)}{N_{trn}(c-1)^3} + o(1)$ .
4.  $\mathbb{E}[\|k\|^2] = \frac{c}{1-c} + o(1)$  and  $\text{Var}(\|k\|^2) = \frac{c^2(2+c)}{M(1-c)^3} + o(1)$ .
5.  $\mathbb{E}[\|s\|^2] = \frac{c-1}{c} + o(1)$  and  $\text{Var}(\|s\|^2) = 2\frac{1}{Mc} + o(1)$ .
6.  $\mathbb{E}[\|t\|^2] = 1-c + o(1)$ ,  $\text{Var}(\|t\|^2) = 2\frac{c}{N_{trn}} + o(1)$ .

**Lemma 8.** Under standard noise assumptions, we have that

$$\mathbb{E}[\text{Tr}(h^T k^T A_{trn}^\dagger)] = 0 \text{ and } \text{Var}(\text{Tr}(h^T k^T A_{trn}^\dagger)) = \chi_3(c)/N_{trn},$$

where  $\chi_3(c) = \mathbb{E}[1/\lambda^3]$ ,  $\lambda$  is an eigenvalue for  $AA^T$  and  $A$  is as in Lemma 6.

**Lemma 9.** Under standard noise assumptions, we have that

$$\text{Tr}((A_{trn}^\dagger)^T k k^T A_{trn}^\dagger) = \frac{c^2}{(1-c)^3} + o(1) \text{ and } \text{Var}(\text{Tr}((A_{trn}^\dagger)^T k k^T A_{trn}^\dagger)) = \frac{3}{M} \chi_4(c) - \frac{1}{M} \frac{c^4}{(1-c)^6}$$

where  $\chi_4(c) = \mathbb{E}[1/\lambda^4]$ ,  $\lambda$  is an eigenvalue for  $AA^T$  and  $A$  is as in Lemma 6.

**Lemma 10.** Under the same assumptions as Proposition 2, we have that  $\text{Tr}(h^T s^T) = 0$ .

Lemmas 7, 8, 9, and 10 tell us that all of the terms are highly concentrated. Thus, even though such terms may not be uncorrelated, we can use the fact that  $|\mathbb{E}[XY] - \mathbb{E}[X]\mathbb{E}[Y]| < \sqrt{\text{Var}(X)\text{Var}(Y)}$ , to treat the terms as if they are uncorrelated. Since these variances have now been shown to be  $o(1)$ , we have that for each of these terms  $\mathbb{E}[XY] = \mathbb{E}[X]\mathbb{E}[Y] + o(1)$ . For example, since  $\tau_1 = \beta^2 + \theta_{trn}^2 \|t\|^2 \|k\|^2 + o(1)$ , using Lemmas 1, 4, and 6, and our abuse of notation, we have that  $\mathbb{E}[\tau_1] = 1 + \theta_{trn}^2 c + o(1)$ . Similarly,  $\mathbb{E}[\tau_2] = 1 + \theta_{trn}^2 + o(1)$ . Finally, using these lemmas, we can simplify the expressions in Lemma 4 to get the following formulas for the expected generalization error shown in Equations 3 and 4.

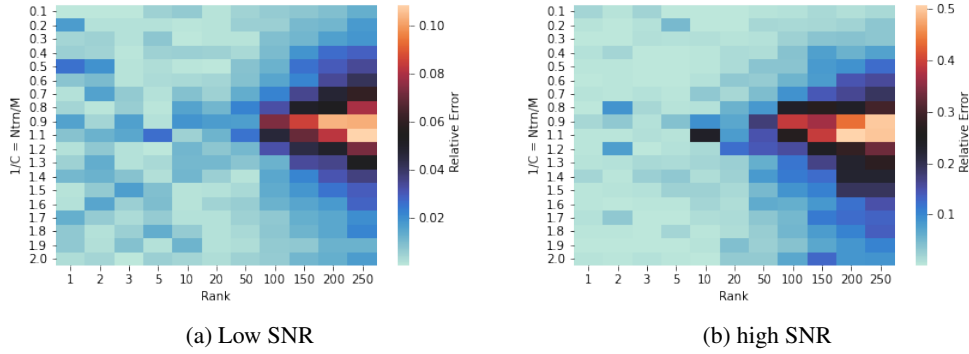

Figure 7: Figure showing the relative error for the our formula.  $M = 2500$  and  $c$  is changed by changing  $N_{trn}$ . For low rank, we average over 10 trials and for high rank, we average over 100 trials.

## 5 EXPERIMENTS

In this section we experimentally verify the accuracy of our formula for general rank  $r$  data. Here for each rank and number of data points, for low SNR we sample  $\sigma_i^{trn} \sigma_i^{tst}$  I.I.D. from squared standard Gaussian and for high SNR we multiply this by  $\sqrt{N_{trn}}, \sqrt{N_{tst}}$ . As we can from Figure 7, see that our formula is better for low SNR and low rank data.

## REFERENCES

- Ben Adlam and Jeffrey Pennington. The neural tangent kernel in high dimensions: Triple descent and a multi-scale theory of generalization. In *ICML*, 2020.
- Madhu S. Advani and Andrew M. Saxe. High-dimensional dynamics of generalization error in neural networks. *Neural Networks*, 132:428 – 446, 2020.
- Z. Bai, B. Miao, and J. Yao. Convergence rates of spectral distributions of large sample covariance matrices. *SIAM J. Matrix Anal. Appl.*, 25:105–127, 2003.
- P. Bartlett, Philip M. Long, G. Lugosi, and Alexander Tsigler. Benign overfitting in linear regression. *Proceedings of the National Academy of Sciences*, 117:30063 – 30070, 2020.
- Mikhail Belkin, Daniel J. Hsu, Siyuan Ma, and Soumik Mandal. Reconciling modern machine-learning practice and the classical bias–variance trade-off. *Proceedings of the National Academy of Sciences*, 116:15849 – 15854, 2019.
- Mikhail Belkin, Daniel J. Hsu, and Ji Xu. Two models of double descent for weak features. *SIAM J. Math. Data Sci.*, 2:1167–1180, 2020.
- Chris M. Bishop. Training with noise is equivalent to tikhonov regularization. *Neural Comput.*, 7(1):108–116, January 1995. ISSN 0899-7667. doi: 10.1162/neco.1995.7.1.108. URL <https://doi.org/10.1162/neco.1995.7.1.108>.
- Stéphane d’Ascoli, Levent Sagun, and G. Biroli. Triple descent and the two kinds of overfitting: Where & why do they appear? *ArXiv*, abs/2006.03509, 2020.
- Michał Dereziński, Feynman T. Liang, and Michael W. Mahoney. Exact expressions for double descent and implicit regularization via surrogate random design. *ArXiv*, abs/1912.04533, 2020.
- J. Devlin, Ming-Wei Chang, Kenton Lee, and Kristina Toutanova. Bert: Pre-training of deep bidirectional transformers for language understanding. In *NAACL*, 2019.
- E. Dobriban and Stefan Wager. High-dimensional asymptotics of prediction: Ridge regression and classification. *arXiv: Statistics Theory*, 2015.
- M. Geiger, Arthur Jacot, S. Spigler, Franck Gabriel, Levent Sagun, Stéphane d’Ascoli, G. Biroli, Clément Hongler, and M. Wyart. Scaling description of generalization with number of parameters in deep learning. *ArXiv*, abs/1901.01608, 2019.
- B. Ghorbani, Song Mei, Theodor Misiakiewicz, and A. Montanari. Linearized two-layers neural networks in high dimension. *ArXiv*, abs/1904.12191, 2019.
- F. Götze and A. Tikhomirov. Rate of convergence to the semi-circular law. *Probability Theory and Related Fields*, 127:228–276, 2003.
- F. Götze and A. Tikhomirov. Rate of convergence in probability to the marchenko-pastur law. *Bernoulli*, 10:503–548, 2004.
- F. Götze and A. Tikhomirov. The rate of convergence for spectra of gue and lue matrix ensembles. *Central European Journal of Mathematics*, 3:666–704, 2005.
- F. Götze and A. Tikhomirov. On the rate of convergence to the marchenko–pastur distribution. *arXiv: Probability*, 2011.
- T. Hastie, A. Montanari, S. Rosset, and R. Tibshirani. Surprises in high-dimensional ridgeless least squares interpolation. *ArXiv*, abs/1903.08560, 2019.
- Arthur Jacot, Franck Gabriel, and Clément Hongler. Neural tangent kernel: convergence and generalization in neural networks (invited paper). *Proceedings of the 53rd Annual ACM SIGACT Symposium on Theory of Computing*, 2018.
- A. Lampinen and S. Ganguli. An analytic theory of generalization dynamics and transfer learning in deep linear networks. *ArXiv*, abs/1809.10374, 2019.

- Tengyuan Liang, A. Rakhlin, and Xiyu Zhai. On the multiple descent of minimum-norm interpolants and restricted lower isometry of kernels. In *COLT*, 2020.
- Bruno Loureiro, Gabriele Sicuro, Cédric Gerbelot, Alessandro Pocco, Florent Krzakala, and Lenka Zdeborová. Learning gaussian mixtures with generalised linear models: Precise asymptotics in high-dimensions, 2021.
- V. Marcenko and L. Pastur. Distribution of eigenvalues for some sets of random matrices. *Mathematics of The Ussr-sbornik*, 1:457–483, 1967.
- Song Mei and A. Montanari. The generalization error of random features regression: Precise asymptotics and double descent curve. *arXiv: Statistics Theory*, 2019.
- Carl D. Meyer, Jr. Generalized inversion of modified matrices. *SIAM Journal on Applied Mathematics*, 24(3):315–323, 1973. doi: 10.1137/0124033. URL <https://doi.org/10.1137/0124033>.
- V. Muthukumar, Kailas Vodrahalli, and A. Sahai. Harmless interpolation of noisy data in regression. *2019 IEEE International Symposium on Information Theory (ISIT)*, pp. 2299–2303, 2019.
- Preetum Nakkiran. More data can hurt for linear regression: Sample-wise double descent, 2020.
- Preetum Nakkiran, Prayaag Venkat, Sham M. Kakade, and Tengyu Ma. Optimal regularization can mitigate double descent. In *International Conference on Learning Representations*, 2020. URL <https://openreview.net/forum?id=7R7fAoUygoa>.
- N. R. Rao and A. Edelman. The polynomial method for random matrices. *Foundations of Computational Mathematics*, 8:649–702, 2008.
- Pascal Vincent, Hugo Larochelle, Isabelle Lajoie, Yoshua Bengio, and Pierre-Antoine Manzagol. Stacked denoising autoencoders: Learning useful representations in a deep network with a local denoising criterion. *J. Mach. Learn. Res.*, 11:3371–3408, December 2010. ISSN 1532-4435.

In this section we present all of the proofs for the results in the main text. Here we present the proofs in the same order they appear in the text.

section Noise Assumptions

**Proposition 1.** *If  $B$  is a random matrix that has full rank with probability 1 and its entries are independent, have mean 0, and have variance  $1/M$  and  $P, Q$  are uniformly random orthogonal matrices. Then  $A = PBQ$  satisfies all of our noise assumptions.*

*Proof.* Since  $P, Q$  are a uniformly random orthogonal matrices, and  $A = PBQ$ , then it is clear that  $A$  is rotationally bi-invariant and has full rank.

Since each entry of  $B$  has mean 0 and each entry of  $A$  is a linear combination of entries of  $B$  where the coefficients (i.e., the entries from  $P, Q$  are independent of  $B$ ), we have that each entry of  $B$  have mean 0. Due to the orthogonal nature of  $P, Q$ , we have the variance for an entry of  $A$  is the same as the variance of entry in  $B$ .

Thus, the only thing left to prove is that the entries of  $A$  are uncorrelated. To do this, we note that

$$a_{ij} = \sum_{k=1}^N \sum_{l=1}^M p_{il} b_{lk} q_{kj}.$$

Consider two entries  $a_{i_1 j_1}$  and  $a_{i_2 j_2}$ . Then we have that

$$\begin{aligned} \mathbb{E}[a_{i_1 j_1} a_{i_2 j_2}] &= \mathbb{E} \left[ \left( \sum_{k=1}^N \sum_{l=1}^M p_{i_1 l} b_{lk} q_{kj_1} \right) \left( \sum_{k=1}^N \sum_{l=1}^M p_{i_2 l} b_{lk} q_{kj_2} \right) \right] \\ &= \sum_{k=1}^N \sum_{l=1}^M \mathbb{E}[p_{i_1 l} p_{i_2 l}] \mathbb{E}[b_{lk}^2] \mathbb{E}[q_{kj_1} q_{kj_2}] \\ &= \frac{1}{M} \mathbb{E} \left[ \sum_{l=1}^M p_{i_1 l} p_{i_2 l} \right] \mathbb{E} \left[ \sum_{k=1}^N q_{kj_1} q_{kj_2} \right]. \end{aligned}$$

The second inequality follows from the fact that  $P, Q, B$  are independent from each other, and that fact that the entries of  $B$  are independent and have mean 0. Hence the cross terms have expectation 0. If we have that  $i_1 = i_2$  and  $j_1 \neq j_2$ , then we have that since  $Q$  is an orthogonal matrix

$$\sum_{k=1}^N \mathbb{E}[q_{kj_1} q_{kj_2}] = \mathbb{E} \left[ \sum_{k=1}^N q_{kj_1} q_{kj_2} \right] = 0.$$

Thus, the entries are uncorrelated. Similarly when  $i_1 \neq i_2$  since  $P$  is orthogonal matrix, we get that the entries are uncorrelated.  $\square$

**Convergence to Marchenko-Pastur.** If we strengthened the uncorrelated condition, to the entries being independent. Then due to the mean and variance assumptions (along with an assumption that the fourth moment is bounded), we would have convergence to Marchenko-Pastur distribution. However, the independence along with the bi-invariance would then force our noise distribution to be i.i.d. Gaussian.

In general however, with relaxed assumption of the entries only being uncorrelated, convergence is not known. However, in our case, we have a much simpler proof for matrices formed by Proposition 1. In our case, the noise matrices  $B$  satisfy the standard assumptions for convergence. We then multiply  $B$  by orthogonal matrices that are independent to  $B$ . Hence this has no effect on the eigenvalue distribution. Thus, the eigenvalues distribution for these matrices also converge to the Marchenko-Pastur distribution.

## A PROOFS

Due to our data generation assumptions that  $\|\Sigma_{trn}\|_F = \|\Sigma_{tst}\|_F = 1$  for rank 1 data, we have that  $\sigma_1^{trn} = \sigma_1^{tst} = 1$ .

A.1 STEP 2: FORMULA FOR  $W_{opt}$ 

**Proposition 2.** Let  $h = v_{trn}^T A_{trn}^\dagger$ ,  $k = A_{trn}^\dagger u$ ,  $s = (I - A_{trn} A_{trn}^\dagger)u$ ,  $t = v_{trn}(I - A_{trn}^\dagger A_{trn})$ ,  $\beta = 1 + \theta_{trn} v_{trn}^T A_{trn}^\dagger u$ ,  $\tau_1 = \theta_{trn}^2 \|t\|^2 \|k\|^2 + \beta^2$ , and  $\tau_2 = \theta_{trn}^2 \|s\|^2 \|h\|^2 + \beta^2$ . If  $\beta \neq 0$  and  $A_{trn}$  has full rank then

$$W_{opt} = \begin{cases} \frac{\theta_{trn}\beta}{\tau_1} uh + \frac{\theta_{trn}^2 \|t\|^2}{\tau_1} uk^T A_{trn}^\dagger & c < 1 \\ \frac{\theta_{trn}\beta}{\tau_2} uh + \frac{\theta_{trn}^2 \|h\|^2}{\tau_2} us^T & c > 1 \end{cases}.$$

*Proof.* Let us first proof the case when  $c > 1$ . Here we know that  $u$  is arbitrary. Here we have that  $A_{trn}$  has full rank. Thus, since  $c > 1$ , we have that  $M > N_{trn}$ , thus  $A_{trn}$  has rank  $N_{trn}$ . Thus, the rows of  $A_{trn}$  span the whole space. Thus,  $v_{trn}$  lives in the range of  $A_{trn}^T$ . Finally, since  $\beta \neq 0$ , we want Theorem 5 from Meyer (1973).

Here let us further define

$$p_2 = -\frac{\theta_{trn}^2 \|s\|^2}{\beta} A_{trn}^\dagger h^T - \theta_{trn} k \text{ and } q_2^T = -\frac{\theta_{trn} \|h\|^2}{\beta} s^T - h$$

and finally  $\tau_2 = \theta_{trn}^2 \|s\|^2 \|h\|^2 + \beta^2$ . Then we have from Meyer (1973) that

$$(A_{trn} + \theta_{trn} uv_{trn}^T)^\dagger = A_{trn}^\dagger + \frac{\theta_{trn}}{\beta} A_{trn}^\dagger h^T s^T - \frac{\beta}{\tau_2} p_2 q_2^T$$

In our case, we only care about  $\theta_{trn} uv_{trn}^T (A_{trn} + \theta_{trn} uv_{trn}^T)^\dagger$ . Thus let us multiply this through and see what we get.

$$\begin{aligned} \theta_{trn} uv_{trn}^T (A_{trn} + \theta_{trn} uv_{trn}^T)^\dagger &= \theta_{trn} uv_{trn}^T (A_{trn}^\dagger + \frac{\theta_{trn}}{\beta} A_{trn}^\dagger h^T s^T - \frac{\beta}{\tau_2} p_2 q_2^T) \\ &= \theta_{trn} uh + \frac{\theta_{trn}^2 \|h\|^2}{\beta} us^T + \frac{\theta_{trn}\beta}{\tau_2} uv_{trn}^T \left( \frac{\theta_{trn}^2 \|s\|^2}{\beta} A_{trn}^\dagger h^T + \theta_{trn} k \right) q_2^T \\ &= \theta_{trn} uh + \frac{\theta_{trn}^2 \|h\|^2}{\beta} us^T + \frac{\theta_{trn}^3 \|s\|^2 \|h\|^2}{\tau_2} u q_2^T + \frac{\theta_{trn}^2 \beta}{\tau_2} uh u q_2^T \end{aligned}$$

Then we have that

$$\frac{\theta_{trn}^3 \|s\|^2 \|h\|^2}{\tau_2} u q_2^T = -\frac{\theta_{trn}^4 \|s\|^2 \|h\|^4}{\tau_2 \beta} us^T - \frac{\theta_{trn}^3 \|s\|^2 \|h\|^2}{\tau_2} uh \quad (9)$$

and

$$\frac{\theta_{trn}^2 \beta}{\tau_2} uh u q_2^T = -\frac{\theta_{trn}^3 \|h\|^2}{\tau_2} uh us^T - \frac{\theta_{trn}^2 \beta}{\tau_2} uh uh. \quad (10)$$

Using that  $\beta - 1 = \theta_{trn} v_{trn}^T A_{trn}^\dagger u = \theta_{trn} hu$ , we get that

$$\frac{\theta_{trn}^2 \beta}{\tau_2} uh u q_2^T = -\frac{\theta_{trn}^2 \|h\|^2 (\beta - 1)}{\tau_2} us^T - \frac{\theta_{trn} \beta (\beta - 1)}{\tau_2} uh. \quad (11)$$

Substituting back in and collecting like terms we get that

$$\begin{aligned} \theta_{trn} uv_{trn}^T (A_{trn} + \theta_{trn} uv_{trn}^T)^\dagger &= \theta_{trn} u \left( 1 - \frac{\theta_{trn}^2 \|s\|^2 \|h\|^2}{\tau_2} - \frac{\beta(\beta - 1)}{\tau_2} \right) h + \\ &\quad \theta_{trn} u \left( \frac{\|h\|^2}{\beta} - \frac{\theta_{trn}^2 \|s\|^2 \|h\|^4}{\tau_2 \beta} - \frac{\|h\|^2 (\beta - 1)}{\tau_2} \right) s^T \end{aligned}$$

We can then simplify the constants as follows.

$$1 - \frac{\theta_{trn}^2 \|s\|^2 \|h\|^2}{\tau_2} - \frac{\beta(\beta - 1)}{\tau_2} = \frac{\tau_2 - \theta_{trn}^2 \|s\|^2 \|h\|^2 - \beta^2 + \beta}{\tau_2} = \frac{\beta}{\tau_2}$$

and

$$\frac{\|h\|^2}{\beta} - \frac{\theta_{trn}^2 \|s\|^2 \|h\|^4}{\tau_2 \beta} - \frac{\|h\|^2(\beta - 1)}{\tau_2} = \frac{\|h\|^2(\tau_2 - \theta_{trn}^2 \|s\|^2 \|h\|^2 - \beta(\beta - 1))}{\beta \tau_2} = \frac{\|h\|^2 \beta}{\beta \tau_2} = \frac{\|h\|^2}{\tau_2}.$$

This gives us the result for  $c < 1$ .

If  $c > 1$ , then we have that  $M < N_{trn}$ . Thus, the rank of  $A_{trn}$  is  $M$  the range of  $A_{trn}$  is the whole space. Thus,  $u$  lives in the range of  $A_{trn}$ . In this case, we then want Theorem 3 from Meyer (1973). In this case, we define

$$p_1 = -\frac{\theta_{trn}^2 \|k\|^2}{\beta} t^T - k \text{ and } q_1^T = -\frac{\theta_{trn} \|t\|^2}{\beta} k^T A_{trn}^\dagger - h.$$

Then in this case, we have that

$$(A_{trn} + \theta_{trn} uv_{trn}^T)^\dagger = A_{trn}^\dagger + \frac{\theta_{trn} t^T k^T A_{trn}^\dagger}{\beta} - \frac{\beta}{\tau_1} p_1 q_1^T.$$

Then we simplify the equation as we did before!  $\square$

## A.2 STEP 2: FORMULA FOR THE EXPECTED MSE

**Lemma 1.** *If  $A_{tst}$  has mean 0 entries and  $A_{tst}$  is independent of  $X_{tst}$  and  $W$ , then*

$$\mathbb{E}_{A_{tst}} [\|X_{tst} - WY_{tst}\|_F^2] = \mathbb{E}_{A_{tst}} [\|X_{tst} - WX_{tst}\|_F^2] + \mathbb{E}_{A_{tst}} [\|WA_{tst}\|_F^2].$$

*Proof.* Using the fact that for any two matrices  $\|G - H\|_F^2 = \|G\|_F^2 + \|H\|_F^2 - 2\text{Tr}(G^T H)$ , we get that

$$\begin{aligned} \|X_{tst} - WY_{tst}\|^2 &= \|X_{tst} - WX_{tst} - WA_{tst}\|_F^2 \\ &= \|X_{tst} - WX_{tst}\|_F^2 + \|WA_{tst}\|_F^2 - 2\text{Tr}((X_{tst} - WX_{tst})^T WA_{tst}). \end{aligned}$$

Then since the trace is linear, and  $X_{tst}, W$  are independent of  $A_{tst}$ , and  $A_{tst}$  has mean 0 entries, we see that

$$\mathbb{E}_{A_{tst}} [\text{Tr}((X_{tst} - WX_{tst})^T WA_{tst})] = 0.$$

Thus, we have the needed result.  $\square$

**Lemma 3.** *If the entries of  $A_{tst}$  are independent with mean 0, and variance  $1/M$ , then we have that  $\mathbb{E}_{A_{tst}} [\|WA_{tst}\|^2] = \frac{N_{tst}}{M} \|W\|^2$ .*

*Proof.* To see this, we note if we look at  $A_{tst} A_{tst}^T$ , then this is a  $M$  by  $M$ , for which the expected value of the off diagonal entries is equal to 0, while the expected value of each diagonal entry is  $N_{tst}/M$ . That is,  $\mathbb{E}_{A_{tst}} [A_{tst} A_{tst}^T] = \frac{N_{tst}}{M} I_M$ .

Then note that

$$\|WA_{tst}\|^2 = \text{Tr}(A_{tst}^T W^T W A_{tst}) = \text{Tr}(W^T W A_{tst} A_{tst}^T) = \text{Tr}(W^T W A_{tst} A_{tst}^T).$$

Using the fact that the trace is linear again, we see that

$$\mathbb{E}_{A_{tst}} [\text{Tr}(W^T W A_{tst} A_{tst}^T)] = \text{Tr}(W^T W \mathbb{E}_{A_{tst}} [A_{tst} A_{tst}^T]) = \frac{N_{tst}}{M} \text{Tr}(W^T W) = \frac{N_{tst}}{M} \|W\|_F^2.$$

$\square$

**Lemma 2.** *If  $W$  is the solution to Equation 1, then*

$$X_{tst} - WX_{tst} = \begin{cases} \frac{\beta}{\tau_1} X_{tst} & \text{if } c < 1 \\ \frac{\beta}{\tau_2} X_{tst} & \text{if } c > 1 \end{cases}.$$

*Proof.* To see this, we have the following calculation for when  $N_{trn} > M$ .

$$\begin{aligned} X_{tst} - WX_{tst} &= X_{tst} - \frac{\theta_{trn}\theta_{tst}\beta}{\tau_1} u h u v_{tst}^T - \frac{\theta_{trn}^2 \theta_{tst} \|t\|^2}{\tau_1} u k^T A_{trn}^\dagger u v_{tst}^T \\ &= X_{tst} - \frac{\theta_{trn}\theta_{tst}\beta}{\tau_1} u v_{trn}^T A_{trn}^\dagger u v_{tst}^T - \frac{\theta_{trn}^2 \theta_{tst} \|t\|^2}{\tau_1} u k^T A_{trn}^\dagger u v_{tst}^T. \end{aligned}$$

First, we note that  $\beta = 1 + \theta_{trn} v_{trn}^T A_{trn}^\dagger u$ . Thus, we have that  $\theta_{trn} v_{trn}^T A_{trn}^\dagger u = \beta - 1$ . Thus, substituting this into the second term, we get that

$$X_{tst} - WX_{tst} = X_{tst} - \frac{\theta_{tst}\beta(\beta-1)}{\tau_1} u v_{tst}^T - \frac{\theta_{trn}^2 \theta_{tst} \|t\|^2}{\tau_1} u k^T A_{trn}^\dagger u v_{tst}^T.$$

For the third term, we note that  $k = A_{trn}^\dagger u$ . Thus, we have that  $k^T A_{trn}^\dagger u = k^T k = \|k\|^2$ . Substituting this into the expression, we get that

$$X_{tst} - WX_{tst} = X_{tst} - \frac{\theta_{tst}\beta(\beta-1)}{\tau_1} u v_{tst}^T - \frac{\theta_{trn}^2 \theta_{tst} \|t\|^2 \|k\|^2}{\tau_1} u v_{tst}^T.$$

Noting that  $X_{tst} = \theta_{tst} u v_{tst}^T$ , we get that

$$X_{tst} - WX_{tst} = X_{tst} \left( 1 - \frac{\beta(\beta-1)}{\tau_1} - \frac{\theta_{trn}^2 \|t\|^2 \|k\|^2}{\tau_1} \right).$$

To simplify the constants, we note that  $\tau_1 = \theta_{trn}^2 \|t\|^2 \|k\|^2 + \beta^2$ . Thus, we get that

$$\frac{\tau_1 + \beta - \beta^2 - \theta_{trn}^2 \|t\|^2 \|k\|^2}{\tau_1} = \frac{\beta}{\tau_1}.$$

For the case when  $N_{trn} < M$ , we note that the first term of  $W$  is the same (modulo replacing  $\tau_1$  for  $\tau_2$ ) as it is for the case when  $c > 1$ . Thus, we just need to deal with the last term. Here we see that the last term is

$$\frac{\theta_{trn}^2 \theta_{tst} \|h\|^2}{\tau_2} u s^T u v_{tst}^T.$$

Here we note that  $s = (I - A_{trn} A_{trn}^\dagger)u$ . Thus, in particular,  $s$  is the projection of  $u$  onto the kernel of  $A_{trn}^T$ . Thus, we have that  $u = s + \hat{s}$ , where  $s \perp \hat{s}$ . This then tells us that  $s^T u = \|s\|^2$ . Thus, for this term, we get that it is equal to

$$\frac{\theta^2 \|h\|^2 \|s\|^2}{\tau_2} X_{tst}.$$

For this term we note that  $\tau_2 = \beta^2 + \theta^2 \|h\|^2 \|u\|^2$ . Thus, doing the same simplification as before, we see that for the case when  $N_{trn} < M$ , we have that

$$X_{tst} - WX_{tst} = \frac{\beta}{\tau_2} X_{tst}.$$

□

In light of Lemma 2 and the fact that  $\|X_{tst}\|_F^2 = \theta_{tst}^2$ . We see that if we look at the expected MSE, we have that,

$$\mathbb{E}_{A_{tst}} \left[ \frac{\|X_{tst} - W(X_{tst} + A_{tst})\|^2}{N_{tst}} \right] = \frac{\beta}{N_{tst}\tau_i} \theta_{tst}^2 + \frac{1}{M} \|W\|_F^2,$$

where  $\tau_i$  depends on whether  $c < 1$  or  $c > 1$ .

Finally, let us look at the  $\|W\|$  term.

**Lemma 4.** *If  $\beta \neq 0$  and  $A_{trn}$  has full rank, then we have that if  $c < 1$ ,*

$$\|W\|_F^2 = \frac{\theta_{trn}^2 \beta^2}{\tau_1^2} \text{Tr}(h^T h) + 2 \frac{\theta_{trn}^3 \|t\|^2 \beta}{\tau_1^2} \text{Tr}(h^T k^T A_{trn}^\dagger) + \frac{\theta_{trn}^4 \|t\|^4}{\tau_1^2} \text{Tr}((A_{trn}^\dagger)^T k k^T A_{trn}^\dagger)$$

*and if  $c > 1$ , then we have that*

$$\|W\|_F^2 = \frac{\theta_{trn}^2 \beta^2}{\tau_2^2} \text{Tr}(h^T h) + 2 \frac{\theta_{trn}^3 \|h\|^2 \beta}{\tau_2^2} \text{Tr}(h^T s^T) + \frac{\theta_{trn}^4 \|h\|^4}{\tau_2^2} \text{Tr}(s s^T).$$

*Proof.* To deal with the term  $\text{Tr}(W^T W)$  we are again going to have to look at whether  $N_{trn}$  is bigger than or smaller than  $M$ . First, let us start by looking at the case when  $N_{trn} > M$ . Here we have that

$$\begin{aligned} \|W\|_F^2 &= \text{Tr}(W^T W) \\ &= \text{Tr} \left( \left( \frac{\theta_{trn} \beta}{\tau_1} u h + \frac{\theta_{trn}^2 \|t\|^2}{\tau_1} u k^T A_{trn}^\dagger \right)^T \left( \frac{\theta_{trn} \beta}{\tau_1} u h + \frac{\theta_{trn}^2 \|t\|^2}{\tau_1} u k^T A_{trn}^\dagger \right) \right) \\ &= \frac{\theta_{trn}^2 \beta^2}{\tau_1^2} \text{Tr}(h^T u^T u h) + 2 \frac{\theta_{trn}^3 \|t\|^2 \beta}{\tau_1^2} \text{Tr}(h^T u^T u k^T A_{trn}^\dagger) + \frac{\theta_{trn}^4 \|t\|^4}{\tau_1^2} \text{Tr}((A_{trn}^\dagger)^T k u^T u k^T A_{trn}^\dagger) \\ &= \frac{\theta_{trn}^2 \beta^2}{\tau_1^2} \text{Tr}(h^T h) + 2 \frac{\theta_{trn}^3 \|t\|^2 \beta}{\tau_1^2} \text{Tr}(h^T k^T A_{trn}^\dagger) + \frac{\theta_{trn}^4 \|t\|^4}{\tau_1^2} \text{Tr}((A_{trn}^\dagger)^T k k^T A_{trn}^\dagger). \end{aligned}$$

Where the last inequality is true due to the fact that  $\|u\|^2 = 1$ . How about when  $N_{trn} < M$ . Then we have the following string of equalities instead.

$$\begin{aligned} \|W\|_F^2 &= \text{Tr}(W^T W) \\ &= \text{Tr} \left( \left( \frac{\theta_{trn} \beta}{\tau_2} u h + \frac{\theta_{trn}^2 \|h\|^2}{\tau_2} u s^T \right)^T \left( \frac{\theta_{trn} \beta}{\tau_2} u h + \frac{\theta_{trn}^2 \|h\|^2}{\tau_2} u s^T \right) \right) \\ &= \frac{\theta_{trn}^2 \beta^2}{\tau_2^2} \text{Tr}(h^T u^T u h) + 2 \frac{\theta_{trn}^3 \|h\|^2 \beta}{\tau_2^2} \text{Tr}(h^T u^T u s^T) + \frac{\theta_{trn}^4 \|h\|^4}{\tau_2^2} \text{Tr}(s u^T u s^T) \\ &= \frac{\theta_{trn}^2 \beta^2}{\tau_2^2} \text{Tr}(h^T h) + 2 \frac{\theta_{trn}^3 \|h\|^2 \beta}{\tau_2^2} \text{Tr}(h^T s^T) + \frac{\theta_{trn}^4 \|h\|^4}{\tau_2^2} \text{Tr}(s s^T). \end{aligned}$$

□

### A.3 STEP 3: ESTIMATE USING RANDOM MATRIX THEORY.

**Lemma 5.** *Suppose  $A$  is an  $p$  by  $q$  matrix such that the entries of  $A$  are independent and have mean 0, variance  $1/q$ , and bounded fourth moment. Let  $W_p = A A^T$  and let  $W_q = A^T A$ . Let  $C = p/q$ . Suppose  $\lambda_p, \lambda_q$  are a random eigenvalue of  $W_p, W_q$ . Then*

1. *If  $p < q$ , then  $\mathbb{E} \left[ \frac{1}{\lambda_p} \right] = \frac{1}{1-C} + o(1)$ .*
2. *If  $p < q$ , then  $\mathbb{E} \left[ \frac{1}{\lambda_p^2} \right] = \frac{1}{(1-C)^3} + o(1)$ .*
3. *If  $p < q$ , then  $\mathbb{E} \left[ \frac{1}{\lambda_p^3} \right] = \frac{1}{(1-C)^5} + o(1)$ .*
4. *If  $p < q$ , then  $\mathbb{E} \left[ \frac{1}{\lambda_p^4} \right] = \frac{C^2 + \frac{22}{6}C + 1}{(1-C)^7} + o(1)$ .*
5. *If  $p > q$ , then  $\mathbb{E} \left[ \frac{1}{\lambda_q} \right] = \frac{C^{-1}}{1-C^{-1}} + o(1)$ .*
6. *If  $p > q$ , then  $\mathbb{E} \left[ \frac{1}{\lambda_q^2} \right] = \frac{C^{-2}}{(1-C^{-1})^3} + o(1)$ .*



7. If  $p > q$ , then  $\mathbb{E} \left[ \frac{1}{\lambda_p^3} \right] = \frac{C^{-3}(1+C^{-1})}{(1-C^{-1})^5} + o(1)$ .
8. If  $p > q$ , then  $\mathbb{E} \left[ \frac{1}{\lambda_p^4} \right] = \frac{C^{-4}(C^{-2} + \frac{22}{6}C^{-1} + 1)}{(1-C^{-1})^7} + o(1)$ .

*Proof.* Suppose  $A$  is an  $p$  by  $q$  matrix such that the entries of  $A$  are independent and have mean 0, variance  $1/q$ , and bounded fourth moment. Then we know that  $W_p = AA^T$  is an  $p$  by  $p$  Wishart matrix with  $c = C$ . If we send  $p, q$  to infinity such that  $p/q$  remains constant, then we have the eigenvalue distribution  $F_p$  converges to the Marchenko Pastur distribution  $F$  in probability.

From Rao & Edelman (2008), we know there exists a bi variate polynomial  $L(m, z) = czm^2 - (1 - c - z)m + 1$  such that the zeros of  $L(m, z)$  given by  $L(m(z), z)$  are such that

$$m(z) = \int \frac{1}{\lambda - z} dF(\lambda) = \mathbb{E}_\lambda \left[ \frac{1}{\lambda - z} \right].$$

For the Marchenko-Pastur distribution, we have that for  $z = 0$ , we get that  $m(z) = 1/(1 - c)$ . Thus, for  $\lambda_p$  is an eigenvalue value of  $W_p$ , we have that

$$\mathbb{E} \left[ \frac{1}{\lambda_p} \right] = \frac{1}{1 - c} + o(1).$$

For  $\mathbb{E}_\lambda \left[ \frac{1}{(\lambda - z)^2} \right]$  we need to calculate  $m'(0)$ . Using the implicit function theorem, we know that

$$m'(z) = -1 \left( \frac{\partial L}{\partial m}(m(z), z) \right)^{-1} \frac{\partial L}{\partial z}(m(z), z).$$

Here we can see that  $\partial L / \partial m = 2czm + c + z - 1$ . Thus, at  $(1/(1 - c), 0)$ , this is equal to  $c - 1$ . Also  $\partial L / \partial z = cm^2 + m$ . Again at  $(1/(1 - c), 0)$  this is equal to  $\frac{c}{(1 - c)^2} + \frac{1}{1 - c} = \frac{1}{(1 - c)^2}$ . Thus, we have that

$$m'(0) = \frac{1}{(1 - c)^3}.$$

Similarly, using the implicit function formulation, we can calculate  $m''(0)$  and  $m'''(0)$ .

On the other hand if  $q < p$ , then  $W_q := A^T A$  is not a Wishart matrix here, because it is scaled by the wrong constant. However, multiplying it by  $1/C$  gives us the correct scaling. Thus,  $A^T A/C$  is a Wishart matrix with  $c = 1/C$ . Thus, for  $\lambda_q$  is an eigenvalue value of  $W_q$ , we have that

$$\mathbb{E} \left[ \frac{1}{\lambda_q} \right] = \frac{C^{-1}}{1 - C^{-1}} + o(1).$$

We can obtain the rest in a similar manner from the previous results. □

**Lemma 6.** Suppose  $A$  is an  $p$  by  $q$  matrix that satisfies the standard noise assumptions. Let  $x, y$  be unit vectors in  $p$  and  $q$  dimensions. Let  $C = p/q$ . Then

1.  $\mathbb{E}[Tr(x^T(AA^T)^\dagger x)] = \begin{cases} \frac{1}{1-C} + o(1) & p < q \\ \frac{q}{p} \frac{C^{-1}}{1-C^{-1}} + o(1) & p > q \end{cases}$ .
2.  $\mathbb{E}[Tr(x^T(AA^T)^\dagger (AA^T)^\dagger x)] = \begin{cases} \frac{1}{(1-C)^3} + o(1) & p < q \\ \frac{q}{p} \frac{C^{-2}}{(1-C^{-1})^3} + o(1) & p > q \end{cases}$ .
3.  $\mathbb{E}[Tr(y^T(A^T A)^\dagger y)] = \begin{cases} \frac{p}{q} \frac{1}{1-C} + o(1) & p < q \\ \frac{C^{-1}}{1-C^{-1}} + o(1) & p > q \end{cases}$ .
4.  $\mathbb{E}[Tr(y^T(A^T A)^\dagger (A^T A)^\dagger y)] = \begin{cases} \frac{p}{q} \frac{1}{(1-C)^3} + o(1) & p < q \\ \frac{C^{-2}}{(1-C^{-1})^3} + o(1) & p > q \end{cases}$ .

*Proof.* Let  $A = U\Sigma V^T$  be the SVD. Then we have that  $(AA^T)^\dagger = U(\Sigma^2)^\dagger U^T$ . Then since  $A$  is bi-unitary invariant, we have that  $U$  is a uniformly random unitary matrix. Thus,  $a = x^T U$  is a uniformly random unit vector. Note with probability 1, the rank of  $A$  is full and that the non-zero eigenvalues of  $A^T A$  and  $AA^T$  are the same.

If  $p < q$ , then we have that

$$\mathbb{E}[\text{Tr}(x^T (AA^T)^\dagger x)] = \sum_{i=1}^p a_i^2 \frac{1}{\sigma_i^2}.$$

Using Lemma 5, we have that  $\mathbb{E}[1/\sigma_i^2] = 1/(1-C) + o(1)$ . Thus, we have that

$$\mathbb{E}[\text{Tr}(x^T (AA^T)^\dagger x)] = \sum_{i=1}^p \frac{1}{p} \frac{1}{1-C} + o(1).$$

On the other hand, if  $p > q$ , from Lemma 5, we have that  $\mathbb{E}[1/\sigma_i^2] = C^{-1}/(1-C^{-1}) + o(1)$ . Thus,

$$\mathbb{E}[\text{Tr}(x^T (AA^T)^\dagger x)] = \sum_{i=1}^q \frac{1}{p} \frac{C^{-1}}{1-C^{-1}} + o(1).$$

Similarly, if we had we looking at  $\text{Tr}(x^T (AA^T)^\dagger (AA^T)^\dagger x)$ , we would have a  $1/\sigma_i^4$  term instead. Thus, if  $p < q$ , we would have that

$$\mathbb{E}[\text{Tr}(x^T (AA^T)^\dagger (AA^T)^\dagger x)] = \frac{1}{(1-C)^3} + o(1).$$

A similar calculation holds for the others. □

Now we have the following Lemma in the main text. However, here instead of having one big proof, we will separate each term out into its own lemma.

**Lemma 7.** *If  $A_{trn}$  satisfies the standard noise assumptions, then we have that*

1.  $\mathbb{E}[\beta] = 1 + o(1)$  and  $\text{Var}(\beta) = \frac{\theta_{trn}^2 c}{(\max(M, N_{trn})|1-c|)} + o(1)$ .
2. If  $c < 1$ , then  $\mathbb{E}[\|h\|^2] = \frac{c^2}{1-c} + o(1)$  and  $\text{Var}(\|h\|^2) = \frac{c^3(2+c)}{N_{trn}(1-c)^3} + o(1)$ .
3. If  $c > 1$ , then  $\mathbb{E}[\|h\|^2] = \frac{c}{c-1} + o(1)$  and  $\text{Var}(\|h\|^2) = \frac{c^2(2c-1)}{N_{trn}(c-1)^3} + o(1)$ .
4.  $\mathbb{E}[\|k\|^2] = \frac{c}{1-c} + o(1)$  and  $\text{Var}(\|k\|^2) = \frac{c^2(2+c)}{M(1-c)^3} + o(1)$ .
5.  $\mathbb{E}[\|s\|^2] = \frac{c-1}{c} + o(1)$  and  $\text{Var}(\|s\|^2) = 2\frac{1}{Mc} + o(1)$ .
6.  $\mathbb{E}[\|t\|^2] = 1 - c + o(1)$ ,  $\text{Var}(\|t\|^2) = 2\frac{c}{N_{trn}} + o(1)$ .

**Lemma 11.**  *$\beta$  term.*

*Proof.* First, we calculate the expected value of  $\beta$ . To do so, let  $A_{trn} = U\Sigma V^T$  be the SVD. Then since  $A_{trn}$  is bi-unitarily invariant, we have that  $U, V$  are uniformly random unitary matrices. Since  $u, v_{trn}$  are fixed. We have that  $a := v_{trn}^T V \in \mathbb{R}^{N_{trn}}$  and  $b := U^T u \in \mathbb{R}^M$  are uniformly random unit vectors. In particular, we have that  $\mathbb{E}[a_i] = 0$ ,  $\mathbb{E}[b_i] = 0$ ,  $\text{Var}(a_i) = 1/N_{trn}$ ,  $\text{Var}(b_i) = 1/M$ .

Thus, if  $\sigma_i$  are the singular values for  $A_{trn}$ , then we have that

$$\beta = 1 + \theta_{trn} \sum_{i=1}^{\min(M, N_{trn})} \frac{1}{\sigma_i} a_i b_i.$$

Thus, if you take the expectation you get that

$$\mathbb{E}[\beta] = 1.$$

On the other hand, let's look at the variance. For the variance, we need to compute  $\mathbb{E}[\beta^2]$ . Now if we let  $T := \theta_{trn} v_{trn}^T A_{trn}^\dagger u$ . Then we have that

$$\beta^2 = 1 + T^2 + 2T.$$

Thus, again if we take the expectation, we get that

$$\mathbb{E}[\beta^2] = 1 + \mathbb{E}[T^2].$$

Again due to the fact that  $a, b$  are independent have mean 0 entries, the cross terms in  $\mathbb{E}[T^2]$ . Thus, we have that

$$\mathbb{E}[T^2] = \theta_{trn}^2 \mathbb{E} \left[ \sum_{i=1}^{\min(M, N_{trn})} \frac{1}{\sigma_i^2} a_i^2 b_i^2 \right] = \theta_{trn}^2 \frac{1}{M N_{trn}} \mathbb{E} \left[ \sum_{i=1}^{\min(M, N_{trn})} \frac{1}{\sigma_i^2} \right].$$

Now we need to case on whether  $M > N_{trn}$  or  $M < N_{trn}$ . Now to use Lemma 5, we note that  $q = M$  and  $p = N_{trn}$ .

Suppose we have that  $M > N_{trn}$ , then in this case, we have that  $q > p$ . Thus, we have that

$$\mathbb{E} \left[ \frac{1}{\sigma_i^2} \right] = \frac{1}{1 - C} + o(1),$$

where  $C = p/q = N_{trn}/M = 1/c$ . Thus, we have that

$$\mathbb{E} \left[ \frac{1}{\sigma_i^2} \right] = \frac{1}{1 - 1/c} + o(1) = \frac{c}{c - 1} + o(1).$$

Thus, we have that

$$\mathbb{E}[T^2] = \theta_{trn}^2 \frac{c}{M(c - 1)} + o\left(\frac{1}{M}\right).$$

Thus, we have

$$\text{Var}(\beta) = \theta_{trn}^2 \frac{c}{M(c - 1)} + o\left(\frac{1}{M}\right).$$

On the other hand, if  $M < N_{trn}$ . Then we have that  $q < p$ . Thus, we have that

$$\mathbb{E} \left[ \frac{1}{\sigma_i^2} \right] = \frac{C^{-1}}{1 - C^{-1}} + o(1),$$

where  $C = p/q = N_{trn}/M = 1/c$ . Thus, we have that

$$\mathbb{E} \left[ \frac{1}{\sigma_i^2} \right] = \frac{c}{1 - c} + o(1).$$

Thus, we have that

$$\mathbb{E}[T^2] = \theta_{trn}^2 \frac{1}{N_{trn}} \left( \frac{c}{1 - c} + o(1) \right) = \frac{c}{N_{trn}(1 - c)} + o\left(\frac{1}{N_{trn}}\right).$$

Thus, we have

$$\text{Var}(\beta) = \theta_{trn}^2 \frac{c}{N_{trn}(1 - c)} + o\left(\frac{1}{N_{trn}}\right).$$

□

**Lemma 12.**  $\|h\|^2$  term.

*Proof.* We want to do a calculation similar to that in Lemma 1. Here we have that

$$\|h\|^2 = \text{Tr}(h^T h) = \text{Tr}((A_{trn}^\dagger)^T v_{trn} v_{trn}^T A_{trn}^\dagger) = \text{Tr}(v_{trn}^T A_{trn}^\dagger (A_{trn}^\dagger)^T v_{trn}) = \text{Tr}(v_{trn}^T (A_{trn}^T A_{trn})^\dagger v_{trn}).$$

To use Lemma 6, we note that  $A = A_{trn}^T$ ,  $q = M$ ,  $p = N_{trn}$ . Let us now suppose that  $M < N_{trn}$ . Then again taking the expectation, we see that

$$\mathbb{E}[\|h\|^2] = \frac{M}{N_{trn}} \left( \frac{c}{1-c} + o(1) \right) = \frac{c^2}{1-c} + o(1).$$

For the expectation of  $\|h\|^4$ , let  $A_{trn} = U\Sigma V^T$  be the svd. Then  $h = v_{trn}^T V \Sigma^\dagger U^T$ . Let  $a = v_{trn}^T V$  and note that  $a$  is a uniformly random unit vector. Thus, we have that

$$\|h\|^2 = \sum_{i=1}^M \frac{1}{\sigma_i^2} a_i^2.$$

For the expectation of  $\|h\|^4$ , we note that

$$\|h\|^4 = \sum_{i=1}^M \sum_{j=1}^M \frac{1}{\sigma_i^2 \sigma_j^2} a_i^2 a_j^2 = \sum_{i=1}^M \frac{1}{\sigma_i^4} a_i^4 + \sum_{i \neq j} \frac{1}{\sigma_i^2} \frac{1}{\sigma_j^2} a_i^2 a_j^2.$$

Taking the expectation of the first term, we get

$$\sum_{i=1}^M \mathbb{E} \left[ \frac{1}{\sigma_i^4} \right] \mathbb{E}[a_i^4] = \frac{3M}{N_{trn}^2} \left( \frac{c^2}{(1-c)^3} + o(1) \right) = 3 \frac{c^3}{N_{trn}(1-c)^3} + o(1).$$

Taking the expectation of the second term, we get

$$M(M-1) \mathbb{E} \left[ \frac{1}{\sigma_i^2} \right]^2 \mathbb{E}[a_i^2]^2 = M(M-1) \frac{1}{N_{trn}^2} \left( \frac{c^2}{(1-c)^2} + o(1) \right) = \frac{c^4}{(1-c)^2} - \frac{c^3}{N_{trn}(1-c)^2} + o(1).$$

Thus, we have that

$$\mathbb{E}[\|h\|^4] = \frac{c^4}{(1-c)^2} + \frac{c^3(2+c)}{N_{trn}(1-c)^3} + o(1).$$

Thus, the variance is

$$\text{Var}(\|h\|^2) = \frac{c^3(2+c)}{N_{trn}(1-c)^3} + o(1).$$

For  $M > N_{trn}$ , we instead have that

$$\mathbb{E}[\|h\|^2] = \frac{N_{trn}}{N_{trn}} \left( \frac{c}{c-1} + o(1) \right) = \frac{c}{c-1} + o(1).$$

For the expectation of  $\|h\|^4$ , we note that

$$\|h\|^4 = \sum_{i=1}^{N_{trn}} \sum_{j=1}^{N_{trn}} \frac{1}{\sigma_i^2 \sigma_j^2} a_i^2 a_j^2 = \sum_{i=1}^{N_{trn}} \frac{1}{\sigma_i^4} a_i^4 + \sum_{i \neq j} \frac{1}{\sigma_i^2} \frac{1}{\sigma_j^2} a_i^2 a_j^2.$$

Taking the expectation of the first term, we get

$$\sum_{i=1}^{N_{trn}} \mathbb{E} \left[ \frac{1}{\sigma_i^4} \right] \mathbb{E}[a_i^4] = \frac{3N_{trn}}{N_{trn}^2} \left( \frac{c^3}{(c-1)^3} + o(1) \right) = 3 \frac{c^3}{N_{trn}(c-1)^3} + o(1).$$

Taking the expectation of the second term, we get

$$\begin{aligned} N_{trn}(N_{trn}-1) \mathbb{E} \left[ \frac{1}{\sigma_i^2} \right]^2 \mathbb{E}[a_i^2]^2 &= N_{trn}(N_{trn}-1) \frac{1}{N_{trn}^2} \left( \frac{c^2}{(c-1)^2} + o(1) \right) \\ &= \frac{c^2}{(c-1)^2} - \frac{c^2}{N_{trn}(c-1)^2} + o(1). \end{aligned}$$

Thus, we have that

$$\mathbb{E}[\|h\|^4] = \frac{c^2}{(c-1)^2} + 3 \frac{c^3}{N_{trn}(c-1)^3} - \frac{c^2}{N_{trn}(c-1)^2} + o(1) = \frac{c^2}{(c-1)^2} + \frac{c^2(2c-1)}{N_{trn}(c-1)^3} + o(1).$$

Thus, the variance is

$$\text{Var}(\|h\|^2) = \frac{c^2(2c-1)}{N_{trn}(c-1)^3} + o(1).$$

□

**Lemma 13.**  $\|k\|^2$  term.

*Proof.* First note that  $k$  only appears in the formula when  $c < 1$ . Thus, we can focus on this case. As with  $h$ , we have that

$$\|k\|^2 = \text{Tr}(u^T (A_{trn}^\dagger)^T A_{trn}^\dagger u) = \text{Tr}(u^T (A_{trn} A_{trn}^T)^\dagger u).$$

Again using Lemma 6, with  $q = M, p = N_{trn}, A = A_{trn}, y = u$ . Thus, since we have  $q = M < N_{trn} = p$ , we get that

$$\mathbb{E}[\|k\|^2] = \frac{c}{1-c} + o(1).$$

To calculate the variance, we need to calculate the expectation of  $\|k\|^4$ . Here be again let  $A = U\Sigma V^T$  be the SVD. Then let  $b := U^T u$ . Then we have that

$$\|k\|^2 = \sum_{i=1}^M \frac{1}{\sigma_i^2} b_i^2.$$

Thus, we see that

$$\|k\|^4 = \sum_{i=1}^M \frac{1}{\sigma_i^4} b_i^4 + \sum_{i \neq j} \frac{1}{\sigma_i^2} \frac{1}{\sigma_j^2} b_i^2 b_j^2.$$

Taking the expectation of the first term we get

$$3 \frac{M}{M^2} \frac{c^2}{(1-c)^3} = \frac{3c^2}{M(1-c)^3}.$$

Taking the expectation of the second term we get

$$\frac{M(M-1)}{M^2} \frac{c^2}{(1-c)^2} = \frac{c^2}{(1-c)^2} - \frac{c^2}{M(1-c)^2}.$$

Thus, we have that

$$\mathbb{E}[\|k\|^4] = \frac{c^2}{(1-c)^2} + \frac{c^2(2+c)}{M(1-c)^3} + o(1).$$

Thus, we have that

$$\text{Var}(\|k\|^2) = \frac{c^2(2+c)}{M(1-c)^3} + o(1).$$

□

**Lemma 14.**  $\|s\|^2$  term.

*Proof.* First, we note that  $s$  only appears when  $M > N_{trn}$ . Thus, we only need to deal with that case. For this term, we note that  $(I - A_{trn} A_{trn}^\dagger)$  is a projection matrix onto a uniformly random  $M - N_{trn}$  dimensional subspace. Here be again let  $A = U\Sigma V^T$  be the SVD. Then let  $b := U^T u$ .

$$\mathbb{E}[\|s\|^2] = \mathbb{E}[u^T u - u^T A_{trn} A_{trn}^\dagger u] = \mathbb{E}\left[1 - b^T \begin{bmatrix} I_{N_{trn}} & 0 \\ 0 & 0 \end{bmatrix} b\right] = 1 - \sum_{i=1}^{N_{trn}} \frac{1}{M} = 1 - \frac{1}{c}$$

Similarly, we have that

$$\begin{aligned} \|s\|^4 &= \left(1 - \sum_{i=1}^{N_{trn}} b_i^2\right)^2 \\ &= 1 + \left(\sum_{i=1}^{N_{trn}} b_i^2\right)^2 - 2 \sum_{i=1}^{N_{trn}} b_i^2 \\ &= 1 + \sum_{i=1}^{N_{trn}} b_i^4 + \sum_{i \neq j} b_i^2 b_j^2 - 2 \sum_{i=1}^{N_{trn}} b_i^2 \end{aligned}$$

Taking the expectation, we get that

$$\begin{aligned}
\mathbb{E}[\|s\|^4] &= 1 + 3 \sum_{i=1}^{N_{trn}} \frac{1}{M^2} + \sum_{i \neq j}^{N_{trn}} \frac{1}{M^2} - 2 \sum_{i=1}^{N_{trn}} \frac{1}{M} \\
&= 1 + \frac{3}{cM} + \frac{N_{trn}(N_{trn} - 1)}{M^2} - 2 \frac{1}{c} \\
&= 1 + \frac{3}{cM} + \frac{1}{c^2} - \frac{1}{cM} - 2 \frac{1}{c} \\
&= \left(1 - \frac{1}{c}\right)^2 + \frac{2}{cM}
\end{aligned}$$

Thus, we have that

$$\text{Var}(\|s\|^2) = 2 \frac{1}{cM}$$

□

**Lemma 15.**  $\|t\|^2$  term.

*Proof.* First, we note that  $t$  only appears when  $M < N_{trn}$ . Thus, we only need to deal with that case. For this term, we note that  $(I - A_{trn}^\dagger A_{trn})$  is a projection matrix onto a uniformly random  $N_{trn} - M$  dimensional subspace. Then similar to  $\|s\|^2$ , we have that

$$\mathbb{E}[\|t\|^2] = \mathbb{E}[v_{trn}^T v_{trn} - v_{trn}^T A_{trn}^\dagger A_{trn} v_{trn}] = \mathbb{E}\left[1 - a^T \begin{bmatrix} I_M & 0 \\ 0 & 0 \end{bmatrix} a\right] = 1 - \sum_{i=1}^M \frac{1}{N_{trn}} = 1 - c$$

Similarly, we have that

$$\begin{aligned}
\|t\|^4 &= \left(1 - \sum_{i=1}^M a_i^2\right)^2 \\
&= 1 + \left(\sum_{i=1}^M a_i^2\right)^2 - 2 \sum_{i=1}^M a_i^2 \\
&= 1 + \sum_{i=1}^M a_i^4 + \sum_{i \neq j}^M a_i^2 a_j^2 - 2 \sum_{i=1}^M a_i^2
\end{aligned}$$

Taking the expectation, we get that

$$\begin{aligned}
\mathbb{E}[\|t\|^4] &= 1 + 3 \sum_{i=1}^M \frac{1}{N_{trn}^2} + \sum_{i \neq j}^M \frac{1}{N_{trn}^2} - 2 \sum_{i=1}^M \frac{1}{N_{trn}} \\
&= 1 + \frac{3c}{N_{trn}} + \frac{N_{trn}(N_{trn} - 1)}{M^2} - 2c \\
&= 1 + \frac{3c}{N_{trn}} + c^2 - \frac{c}{N_{trn}} - 2c \\
&= (1 - c)^2 + \frac{2}{cM}
\end{aligned}$$

Thus, we have that

$$\text{Var}(\|t\|^2) = 2 \frac{c}{N_{trn}}$$

□

Now we could just use the fact that  $|\mathbb{E}[XY] - \mathbb{E}[X]\mathbb{E}[Y]| < \sqrt{\text{Var}(X)\text{Var}(Y)}$ . Another way to do this is via using big  $O$  in probability. Which is defined as follows:

**Definition 1.** We save that a sequence of random variables  $X_n$  is  $O_P(a_n)$ , if there exists an  $N$  such that for all  $\epsilon > 0$ , there exists a constant  $L$  such that for all  $n \geq N$ , we have that  $\Pr[|X_n| > La_n] < \epsilon$ .

Then the trace terms.

**Lemma 8.** Under standard noise assumptions, we have that

$$\mathbb{E}[\text{Tr}(h^T k^T A_{trn}^\dagger)] = 0$$

and

$$\text{Var}(\text{Tr}(h^T k^T A_{trn}^\dagger)) = \chi_3(c)/N_{trn},$$

where  $\chi_3(c) = \mathbb{E}[1/\lambda^3]$ ,  $\lambda$  is an eigenvalue for  $AA^T$  and  $A$  is as in Lemma 6.

*Proof.* First we note that

$$\text{Tr}(h^T k^T A_{trn}^\dagger) = \text{Tr}((A_{trn}^\dagger)^T v_{trn} u^T (A_{trn}^\dagger)^T A_{trn}^\dagger) = u^T (A_{trn}^\dagger)^T (A_{trn}^\dagger A_{trn}^\dagger)^T v_{trn}.$$

Again let  $A_{trn} = U \Sigma V^T$  be the SVD. Then, we have the middle terms depending on  $A_{trn}$  simplifies to

$$(A_{trn}^\dagger)^T A_{trn}^\dagger (A_{trn}^\dagger)^T = U (\Sigma^\dagger)^T \Sigma^\dagger (\Sigma^\dagger)^T V^T.$$

Thus, again letting  $b = u^T U$  and  $a = V^T v_{trn}$ . We see that

$$\text{Tr}(h^T k^T A_{trn}^\dagger) = \sum_{i=1}^M a_i b_i \frac{1}{\sigma_i^3}.$$

Now if take the expectation, since  $a, b$  are independent and mean 0, we see that

$$\mathbb{E}_{A_{trn}}[\text{Tr}(h^T k^T A_{trn}^\dagger)] = 0.$$

Let us also compute the variance. Here we have that

$$\mathbb{E}[\text{Tr}(h^T k^T A_{trn}^\dagger)^2] = \sum_{i=1}^M \mathbb{E} \left[ \frac{1}{\sigma_i^6} \right] \mathbb{E}[a_i^2] \mathbb{E}[b_i^2] + 0.$$

Now for the Marchenko Pastur distribution we have that the expectation of  $1/\lambda^3 = \chi_3(c)$ . where  $\chi_3$  is some function. Thus, we have that

$$\mathbb{E}[\text{Tr}(h^T k^T A_{trn}^\dagger)^2] = \frac{1}{N_{trn}} \chi_3(c) + o(1).$$

□

**Lemma 9.** Under standard noise assumptions, we have that

$$\text{Tr}((A_{trn}^\dagger)^T k k^T A_{trn}^\dagger) = \frac{c^2}{(1-c)^3} + o(1)$$

and

$$\text{Var}(\text{Tr}((A_{trn}^\dagger)^T k k^T A_{trn}^\dagger)) = \frac{3}{M} \chi_4(c) - \frac{1}{M} \frac{c^4}{(1-c)^6}$$

where  $\chi_4(c) = \mathbb{E}[1/\lambda^4]$ ,  $\lambda$  is an eigenvalue for  $AA^T$  and  $A$  is as in Lemma 6.

*Proof.* Now using Lemma 6, we see that

$$\mathbb{E}_{A_{trn}}[\text{Tr}((A_{trn}^\dagger)^T k k^T A_{trn}^\dagger)] = \frac{c^2}{(1-c)^3}.$$

Similar to proofs before, we have that

$$\mathbb{E}_{A_{trn}}[\text{Tr}((A_{trn}^\dagger)^T k k^T A_{trn}^\dagger)^2] = \sum_{i=1}^M \frac{3}{M^2} \chi_4(c) + \sum_{i \neq j} \frac{1}{M^2} \frac{c^4}{(1-c)^6} + o(1).$$

Where  $\chi_4(c) = \mathbb{E}[1/\lambda^4]$  for the Marchenko Pastur distribution. Thus, we have that

$$\text{Var}(\text{Tr}((A_{trn}^\dagger)^T k k^T A_{trn}^\dagger)) = \frac{3}{M} \chi_4(c) + \frac{1}{M} \frac{c^4}{(1-c)^6} + o(1).$$

□

**Lemma 10.** *Under the same assumptions as Proposition 2, we have that  $\text{Tr}(h^T s^T) = 0$ .*

*Proof.* Here we note that  $h^T = (A_{trn}^\dagger)^T v_{trn}$  and  $s^T = u^T (I - A_{trn} A_{trn}^\dagger)^T$ . Thus, we have that

$$\begin{aligned} \text{Tr}(h^T s^T) &= \text{Tr}((A_{trn}^\dagger)^T v_{trn} u^T - (A_{trn}^\dagger)^T v_{trn} u^T (A_{trn} A_{trn}^\dagger)^T) \\ &= \text{Tr}(v_{trn}^T A_{trn}^\dagger u) - \text{Tr}(u^T (A_{trn} A_{trn}^\dagger)^T (A_{trn}^\dagger)^T v_{trn}) \\ &= \text{Tr}(v_{trn}^T A_{trn}^\dagger u) - \text{Tr}(v_{trn}^T A_{trn}^\dagger A_{trn} A_{trn}^\dagger u) \\ &= \text{Tr}(v_{trn}^T A_{trn}^\dagger u) - \text{Tr}(v_{trn}^T A_{trn}^\dagger u) \\ &= 0 \end{aligned}$$

□

As we can see that if we take the expectation of  $\|W\|$  over  $A_{trn}$ , since the variance of each of the terms is small, we can approximate  $\mathbb{E}[XY]$  with  $\mathbb{E}[X]\mathbb{E}[Y]$ . Then we get the following.

If  $M < N_{trn}$ , we have that

$$\begin{aligned} \mathbb{E}_{A_{trn}}[\|W\|^2] &= \frac{\theta_{trn}^2}{(1 + \theta_{trn}^2 c)^2} \frac{c^2}{(1-c)} + 0 + \frac{\theta_{trn}^4 (1-c)^2}{(1 + \theta_{trn}^2 c)^2} \frac{c^2}{(1-c)^3} \\ &= c^2 \frac{\theta_{trn}^2 + \theta_{trn}^4}{(1 + \theta_{trn}^2 c)^2 (1-c)}. \end{aligned}$$

On the other hand,  $M > N_{trn}$ , we have that

$$\begin{aligned} \mathbb{E}_{A_{trn}}[\|W\|^2] &= \frac{\theta_{trn}^2}{(1 + \theta_{trn}^2)^2} \frac{c}{c-1} + \frac{\theta_{trn}^4}{(1 + \theta_{trn}^2)^2} \frac{c^2}{(c-1)^2} \frac{c-1}{c} \\ &= \frac{c}{c-1} \frac{\theta_{trn}^2 (1 + \theta_{trn}^2)}{(1 + \theta_{trn}^2)^2} \\ &= \frac{\theta_{trn}^2}{1 + \theta_{trn}^2} \frac{c}{c-1}. \end{aligned}$$

Now combining everything together, we get that

$$\mathbb{E}_{A_{trn}, A_{tst}} \left[ \frac{\|X_{tst} - W(X_{tst} + A_{tst})\|}{N_{tst}} \right] = \begin{cases} \frac{\theta_{tst}^2}{N_{tst}(1 + \theta_{trn}^2 c)^2} + \frac{1}{M} c^2 \frac{\theta_{trn}^2 + \theta_{trn}^4}{(1 + \theta_{trn}^2 c)^2 (1-c)} & c < 1 \\ \frac{\theta_{tst}^2}{N_{tst}(1 + \theta_{trn}^2 c)^2} + \frac{1}{M} \frac{\theta_{trn}^2}{1 + \theta_{trn}^2} \frac{c}{c-1} & c > 1 \end{cases}.$$

#### A.4 PROOF OF THEOREM

We can see that the main text has how to put all of the pieces together to prove the main Theorem. We don't replicate that here.

#### A.5 FORMULA FOR $\hat{\theta}_{opt-trn}$

As stated in the main text, we only need to take the derivative. So, we don't present that calculation here as it is fairly straightforward.

## B GENERALIZATIONS

In this section we discuss some possible generalizations of the method.



### B.1 HIGHER RANK

Let us present some heuristics for the higher rank formula. To do so we shall need some notation. Let  $X_{trn} = \sum_{i=1}^r \sigma_i^{trn} u_i (v_i^{trn})^T$ . Let  $A$  be the noise matrix. Then for  $1 \leq j \leq r$ , define

$$A_j = \left( A + \sum_{i=1}^{j-1} \sigma_i^{trn} u_i (v_i^{trn})^T \right)$$

We shall now make some assumptions. Specifically, we assume that  $u_j, v_j^{trn}$ , and  $A_j$  are all such that for  $i_1 \neq i_2$ , and for all  $j$  we have that

$$\mathbb{E}[u_{i_1}^T A_j A_j^\dagger u_{i_2}] = \mathbb{E}[(v_{i_1}^{trn})^T A_j^\dagger A_j v_{i_2}^{trn}] = 0.$$

Additionally, we assume that for all  $i_1, i_2, j$  we have that  $\mathbb{E}[(v_{i_1}^{trn})^T A_j^\dagger u_{i_2}] = 0$ . We also assume that the variance of these terms goes to 0 as  $N_{trn}, M$  go to infinity.

**Lemma 16.** *With the given assumptions, we have that for all  $i < j$ ,*

$$\sigma_i^{trn} u_i (v_i^{trn})^T A_j^\dagger \approx \sigma_i^{trn} u_i (v_i^{trn})^T A_{j-1}^\dagger \approx \sigma_i^{trn} u_i (v_i^{trn})^T A_{j-2}^\dagger \approx \dots \approx \sigma_i^{trn} u_i (v_i^{trn})^T A_{i+1}^\dagger$$

*Proof.* Write  $A_j = A_{j-1} + \sigma_j^{trn} u_j (v_j^{trn})^T$  and use Meyer (1973) to expand the pseudoinverse of  $A_j$ . When we do this, we see that due to the assumption all terms except  $\sigma_i^{trn} u_i (v_i^{trn})^T A_{j-1}^\dagger$  are small.  $\square$

Define  $h_j = (v_j^{trn})^T A_j^\dagger$ ,  $k_j = \sigma_j^{trn} A_j^\dagger u_j$ ,  $t_j = (v_j^{trn})^T (I - A_j^\dagger A_j)$ ,  $s_j = \sigma_j^{trn} (I - A_j A_j^\dagger) u_j$ ,  $\beta_j = 1 + \sigma_j^{trn} (v_j^{trn})^T A_j^\dagger u_j$ ,  $\tau_1^{(j)} = \|t_j\|^2 \|k_j\|^2 + \beta_j^2$ ,  $\tau_2^{(j)} = \|s_j\|^2 \|h_j\|^2 + \beta_j^2$ , and similarly  $p_1^{(j)}, p_2^{(j)}, q_1^{(j)}$ , and  $q_2^{(j)}$ . Now, we can write

$$X_{trn} + A = \sigma_r^{trn} u_r (v_r^{trn})^T + A_{r-1}$$

Then we have that

$$W = X(\sigma_r^{trn} u_r (v_r^{trn})^T + A_r)^\dagger = \sum_{i=1}^r \sigma_i^{trn} u_i (v_i^{trn})^T (\sigma_r^{trn} u_r (v_r^{trn})^T + A_r)^\dagger$$

Expanding and using the lemma, we get that

$$W \approx \sum_{i=1}^r \sigma_i^{trn} u_i (v_i^{trn})^T A_{i+1}^\dagger = \begin{cases} \sum_{i=1}^r \frac{\sigma_i^{trn} \beta_i}{\tau_1^{(i)}} u_i h_i + \frac{(\sigma_i^{trn})^2 \|t_i\|^2}{\tau_1^{(i)}} u_i k_i^T A_i^\dagger & c < 1 \\ \sum_{i=1}^r \frac{\sigma_i^{trn} \beta_i}{\tau_2^{(i)}} u_i h_i + \frac{(\sigma_i^{trn})^2 \|h_i\|^2}{\tau_2^{(i)}} u_i s_i^T & c > 1 \end{cases}$$

Where the second equality comes from the rank 1 results.

Now that we have an approximation for  $W$  (given our assumptions), we can now approximate the variance and bias terms again. Let  $W_i$  denote the  $i$ th factor (corresponding to  $u_i$ ) of  $W$ . First, for the bias, due to the orthogonality of the  $u$ 's we get that

$$\|X_{tst} - W X_{tst}\|_F^2 = \sum_{i=1}^r \left\| \sigma_i^{tst} u_i (v_i^{tst})^T - W_i \sum_{j=1}^r \sigma_j^{tst} u_j (v_j^{tst})^T \right\|_F^2$$

Again, using our assumptions, we see that the terms in the  $j$  summation dropout besides when  $j = i$ . Then again using our rank 1 result, we get that

$$\|X_{tst} - W X_{tst}\|_F^2 = \sum_{i=1}^r \left( \frac{\beta_i}{\tau_{idx}^{(i)}} \sigma_i^{tst} \right)^2$$

For the variance, we again estimate the norm of  $W$  by expanding the trace. Here we see that the cross terms are 0 due to factors of  $u_{i_1}^T u_{i_2}$ . For the diagonal terms, we again use the rank 1 results and get that

$$\|W\|_F^2 = \sum_{i=1}^r \frac{(\sigma_i^{trn})^2 \beta_i^2}{(\tau_1^{(i)})^2} \text{Tr}(h_i^T h_i) + 2 \frac{(\sigma_i^{trn})^3 \|t_i\|^2 \beta_i}{(\tau_1^{(i)})^2} \text{Tr}(h_i^T k_i^T A_i^\dagger) + \frac{(\sigma_i^{trn})^4 \|t_i\|^4}{(\tau_1^{(i)})^2} \text{Tr}((A_i^\dagger)^T k_i k_i^T A_i^\dagger)$$

and if  $c > 1$ , then we have that

$$\|W\|_F^2 = \sum_{i=1}^r \frac{(\sigma_i^{trn})^2 \beta_i^2}{(\tau_2^{(i)})^2} \text{Tr}(h_i^T h_i) + 2 \frac{(\sigma_i^{trn})^3 \|h_i\|^2 \beta_i}{(\tau_2^{(i)})^2} \text{Tr}(h_i^T s_i^T) + \frac{(\sigma_i^{trn})^4 \|h_i\|^4}{(\tau_2^{(i)})^2} \text{Tr}(s_i s_i^T).$$

The final step would be to estimate each of these terms using random matrix theory. However, unfortunately the  $A_j$  may not satisfy all of the needed conditions. However, we know that  $A_j$  is a perturbation of  $A$  and  $A$  satisfies all of the needed conditions. Hence, if the perturbation is small, we can replace  $A_j$  with  $A$  and hopefully not incur too much cost. Note this is also the reason why the previous assumptions might be reasonable. If we replace  $A_j$ 's with  $A$  use our estimates from the rank 1 result. We then get our estimate for the generalization error for general rank  $r$  data.

$$R(\theta_{trn}, \theta_{tst}, c, \Sigma_{trn}, \Sigma_{tst}) = \sum_{i=1}^r \frac{(\theta_{tst} \sigma_i^{tst})^2}{N_{tst} (1 + (\theta_{trn} \sigma_i^{trn})^2 c)^2} + \frac{c^2 ((\theta_{trn} \sigma_i^{trn})^2 + (\theta_{trn} \sigma_i^{trn})^4)}{M (1 + (\theta_{trn} \sigma_i^{trn})^2 c)^2 (1 - c)} + o(1) \quad (12)$$

and if  $c > 1$ , we have that

$$R(\theta_{trn}, \theta_{tst}, c, \Sigma_{trn}, \Sigma_{tst}) = \sum_{i=1}^r \frac{(\theta_{tst} \sigma_i^{tst})^2}{N_{tst} (1 + (\theta_{trn} \sigma_i^{trn})^2)^2} + \frac{c (\theta_{trn} \sigma_i^{trn})^2}{M (1 + (\theta_{trn} \sigma_i^{trn})^2) (c - 1)} + o(1). \quad (13)$$

In the experimental section, we see that for small values of  $r$  for  $c$  bounded away from 1. This seems to be good estimate for the generalization error.

## B.2 RANDOM FEATURES MODEL

Here we assumed that our data is given  $X = U\Sigma V^T$ . One generalization of this that we have a  $G$  whose entries i.i.d Gaussian, or whose columns are uniformly distributed on the unit sphere. Then for non linear function  $\sigma$ , we assume that  $X = \sigma(GU\Sigma V^T)$ . If we assume that  $\sigma$  is linear, then we have that as  $L \rightarrow \infty$ ,  $G^T G \rightarrow I_M$ . Thus, we have that  $GU$  approximately satisfies our assumptions of orthogonal columns. Hence we expect our formula to still be a reasonable approximation.

## C EXPERIMENTS

Please see accompanying notebook for code to produce the data for all of the figures.

### C.1 LOW SNR AND HIGH SNR DATA

For low SNR data, we sample the  $\theta$  times singular values from a squared standard Gaussian. We do this independently for all  $2r$  singular values. We call this the low SNR region because  $\theta$  is not being scaled with the number of data points. Hence as  $N_{trn}, N_{tst} \rightarrow \infty$ , the SNR goes to 0.

For the high rank data, we sample  $\theta$  times singular values from a squared Gaussian and then multiply by  $\sqrt{N_{trn}}, \sqrt{N_{tst}}$ . Hence here the SNR does not go to 0 as  $N_{trn}, N_{tst} \rightarrow \infty$ .

## D GENERALIZATION ERROR VERSUS TRAINING NOISE LEVEL PLOTS

### D.1 MORE TESTS FOR RANK 1

Here we provide more examples of  $c$  and how our theoretical formula matches the experimental performance exactly.

Each empirical point is the average over 50 trials. These were run on a laptop with 8gb of RAM and an i3 processors. The average time to produce any of these plots is about 10 to 30 minutes.

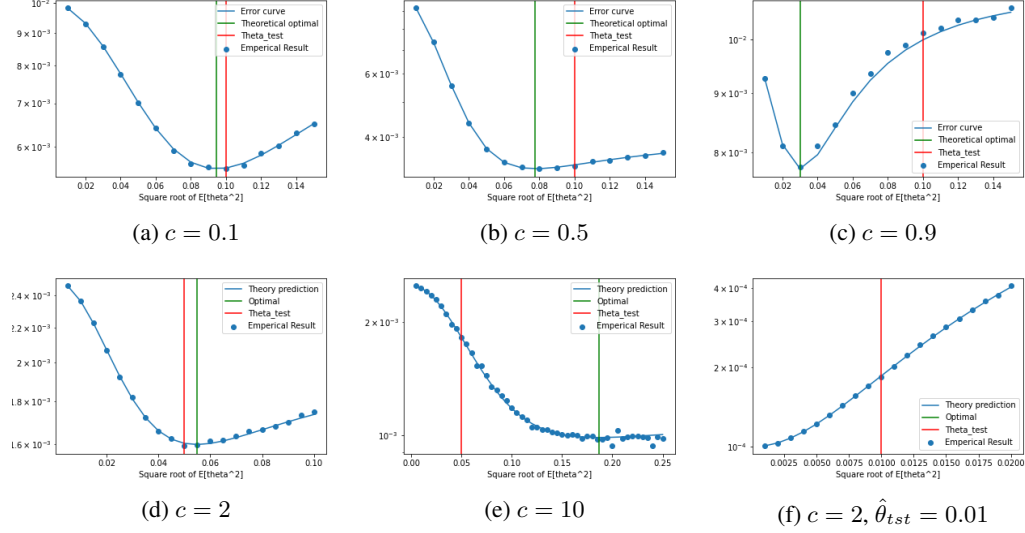

Figure 8: Figures (a) - (e) showing the accuracy of the formula for the expected mean squared error for  $c = 0.1, 0.5, 0.9, 2, 10$  for fixed value of  $\hat{\theta}_{tst}$ . Figure (f) empirically verifies the existence of a regime where training on pure noise is optimal. Here the red and green lines represent  $\mathbb{E}[\hat{\theta}_{tst}^2]$  and  $\mathbb{E}[\hat{\theta}_{trn}^2]$  respectively. Each empirical data point is averaged over at least 50 trials.

### D.2 RANK 2 DATA

Let us now demonstrate that the double descent shaped curve exists beyond rank 1 data and linear autoencoders. We will do this by gradually making the set up more complicated until we can no longer recreate this phenomena. First, we consider rank 2 data is of the following form. Let  $W_{data}$  be some fixed matrix, then our data is generated by

$$X = \text{relu}(W_{data} \text{relu}(uv^T)).$$

Where a different  $v$  is sampled for the training and test data. the results for this can be seen in Figure 9. As we can from the figure, we have the exact same qualitative trend for  $c$  that we saw before. That is, as  $c$  goes from 0 to 1, we have that  $\hat{\theta}_{trn}$  goes from  $\hat{\theta}_{tst}$  to 0, and then as  $c \rightarrow \infty$ , we have that  $\hat{\theta}_{trn}$  goes to infinity as well.

### D.3 MNIST DATA

We now look at the linear network with MNIST data.

#### D.3.1 NON-LINEAR NETWORK

Here, we trained each network for 1500 epochs. During each epoch we computed a gradient using the whole data set. We used Adam as the optimizer with the code written in Pytorch. Each data point was generated over 20 trials.

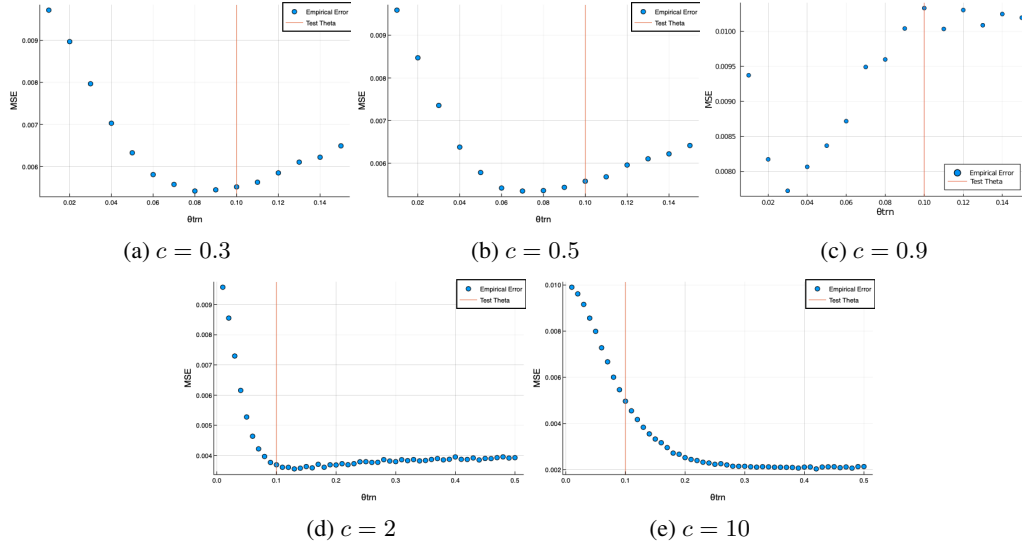

Figure 9: Rank 2

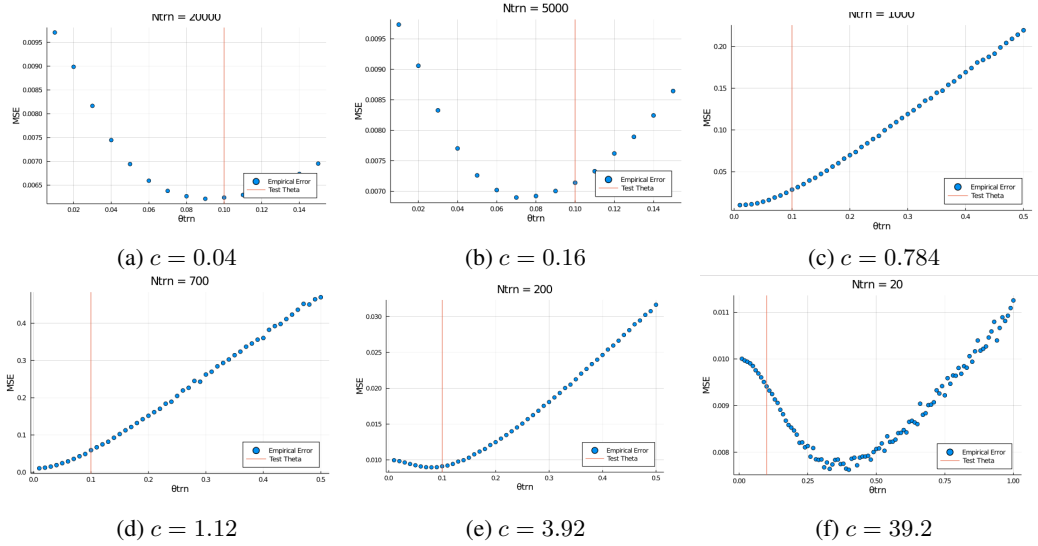

Figure 10: MNIST

These experiments take a little bit more time to run and the one with bigger amounts of data can take upto 5 hours on a google cloud instance with 16gb RAM. Here we used a Telse P4 gpu.

LRL - is a model with a reLU at the end of the first layer only.

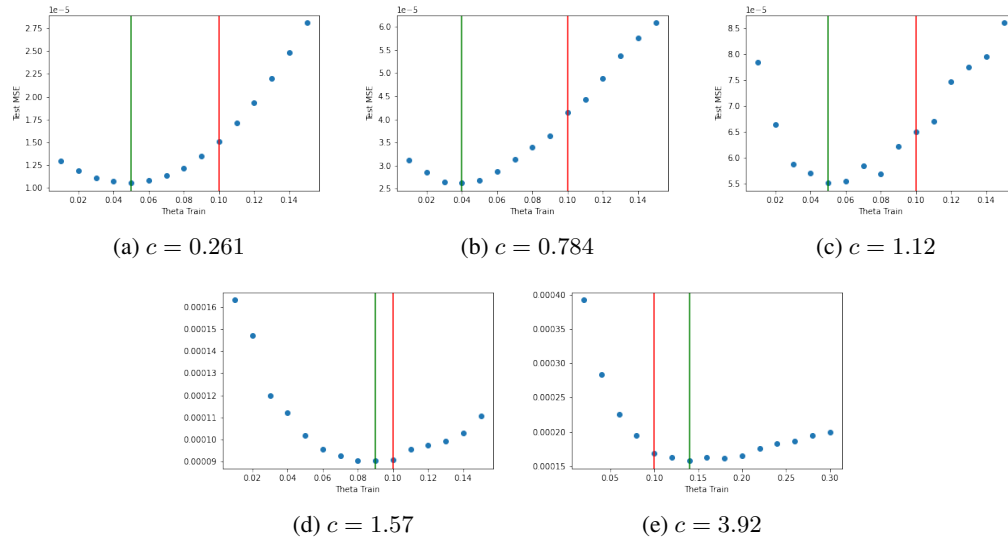

Figure 11: MNIST - LRL model
